# Supplementary material for: Dual mode ratiometric recognition of zinc acetate: nanomolar detection with in vitro tracking of endophytic bacteria in rice root tissue
Source: Royal Society of Chemistry journal article supplement (doi:10.1039/c5dt03431k), 2015-11-12
Supplement: c5dt03431k1.pdf [file c5dt03431k1.pdf]

Manuscript ID: DTART092015003431

## Electronic supporting information (ESI)

### Dual mode ratiometric recognition of zinc acetate: nano-molar detection with *in-vitro* tracking of endophytic bacteria in rice root tissue

Abhijit Ghosh<sup>a</sup>, Sabyasachi Ta<sup>a</sup>, Milan Ghosh<sup>a</sup>, Subhajit Karmakar<sup>b</sup>, Avishek Banik<sup>c</sup>, Tushar Kanti Dangar<sup>c</sup>, Subhrakanti Mukherjee<sup>d</sup>, and Debasis Das<sup>\*a</sup>

<sup>a</sup>Department of Chemistry, The University of Burdwan, Golapbag, Burdwan, India, Fax: +91-342-2530452; Tel: +91-342-2533913 (ext. 424); E-mail: [ddas100in@yahoo.com](mailto:ddas100in@yahoo.com)

<sup>b</sup>University Science Instrumentation Center, The University of Burdwan, Burdwan, West Bengal, India.

<sup>c</sup>Microbiology Laboratory, Crop production division, ICAR- Central Rice Research Institute. Cuttack, Odisha, India.

<sup>d</sup>Department of Microbiology, The University of Burdwan, Burdwan, West Bengal, India.

**Calculations of detection limit:** The values for  $\frac{I_x - I_0}{I_{max} - I_0}$  from the respective fluorescence titration graphs are plotted against the concentration of ZA and the points of concentration axis at which the best linear fitted line crosses are taken as the detection limits.

Now, for A4;  $I_{max} = 1263$ ,  $I_0 = 233$ ,  $(I_{max} - I_0) = 1030$

| Conc. of ZA ( $\mu\text{M}$ ) | $I_x$ | $(I_x - I_0)$ | $(I_x - I_0)/(I_{max} - I_0)$ |
|-------------------------------|-------|---------------|-------------------------------|
| 0.05                          | 249   | 16            | 0.01553                       |
| 0.1                           | 267   | 34            | 0.03301                       |
| 0.2                           | 290   | 57            | 0.05534                       |
| 0.3                           | 328   | 195           | 0.09223                       |
| 0.4                           | 373   | 140           | 0.13592                       |
| 0.6                           | 418   | 185           | 0.17961                       |
| 0.7                           | 463   | 230           | 0.2233                        |
| 0.8                           | 493   | 260           | 0.25243                       |

$\frac{I_x - I_0}{I_{max} - I_0}$   
Now, plot of  $\frac{I_x - I_0}{I_{max} - I_0}$  vs. [ZA] based on  $Y = A + B \cdot X$  ( $A = -0.00095$ ,  $B = 0.31580$ ,  $R = 0.99767$ ) crosses the concentration axis at  $0.003 \mu\text{M}$ , i.e., at  $3.0 \text{ nM}$ , which is considered to be the detection limit for ZA using A4.

Similarly, for A5;  $I_{max} = 1113$ ,  $I_0 = 13$ ,  $(I_{max} - I_0) = 1100$

| Conc. of ZA ( $\mu\text{M}$ ) | $I_x$ | $(I_x - I_0)$ | $(I_x - I_0)/(I_{max} - I_0)$ |
|-------------------------------|-------|---------------|-------------------------------|
| 0.05                          | 33    | 20            | 0.01818                       |

|     |     |     |         |
|-----|-----|-----|---------|
| 0.1 | 63  | 50  | 0.04545 |
| 0.2 | 83  | 70  | 0.06364 |
| 0.3 | 113 | 100 | 0.09091 |
| 0.4 | 173 | 160 | 0.14545 |
| 0.6 | 223 | 210 | 0.19091 |
| 0.7 | 283 | 270 | 0.24545 |
| 0.8 | 343 | 330 | 0.3     |

$$\frac{I_x - I_0}{I_{max} - I_0}$$

Now, plot of  $\frac{I_x - I_0}{I_{max} - I_0}$  vs. [ZA] based on  $Y = A + B \cdot X$  ( $A = -0.00289$ ,  $B = 0.35654$ ,  $R = 0.99213$ ) crosses the concentration axis at  $0.0081 \mu\text{M}$ , i.e., at  $8.1 \text{ nM}$ , which is considered to be the detection limit for ZA using A5.

Also for A6;  $I_{max} = 1145$   $I_0 = 145$ ,  $(I_{max} - I_0) = 1000$

| Conc. of ZA ( $\mu\text{M}$ ) | $I_x$ | $(I_x - I_0)$ | $(I_x - I_0)/(I_{max} - I_0)$ |
|-------------------------------|-------|---------------|-------------------------------|
| 0.3                           | 285   | 140           | 0.14                          |
| 0.4                           | 315   | 170           | 0.17                          |
| 0.5                           | 375   | 230           | 0.23                          |
| 0.6                           | 435   | 290           | 0.29                          |
| 0.7                           | 465   | 320           | 0.32                          |
| 0.9                           | 555   | 410           | 0.41                          |

$$\frac{I_x - I_0}{I_{max} - I_0}$$

Now, plot of  $\frac{I_x - I_0}{I_{max} - I_0}$  vs. [ZA] based on  $Y = A + B \cdot X$  ( $A = -0.00229$ ,  $B = 0.46286$ ,  $R = 0.99591$ ) crosses the concentration axis at  $0.0049 \mu\text{M}$ , i.e., at  $4.9 \text{ nM}$ , which is considered to be the detection limit for ZA using A6.

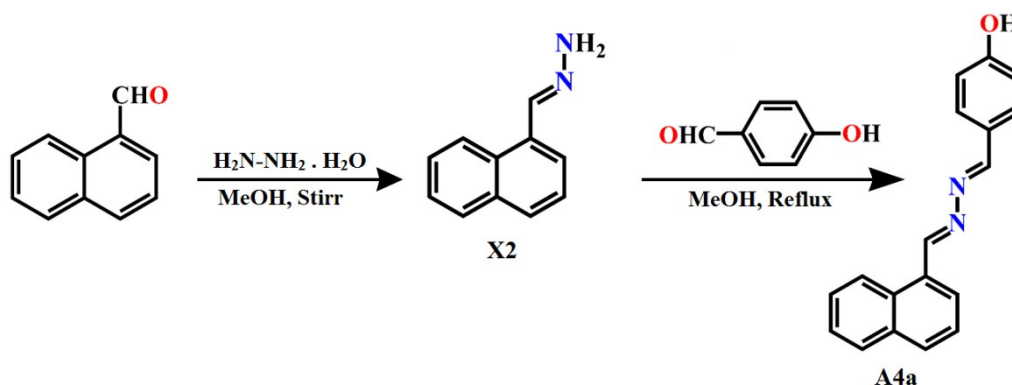

Scheme S1

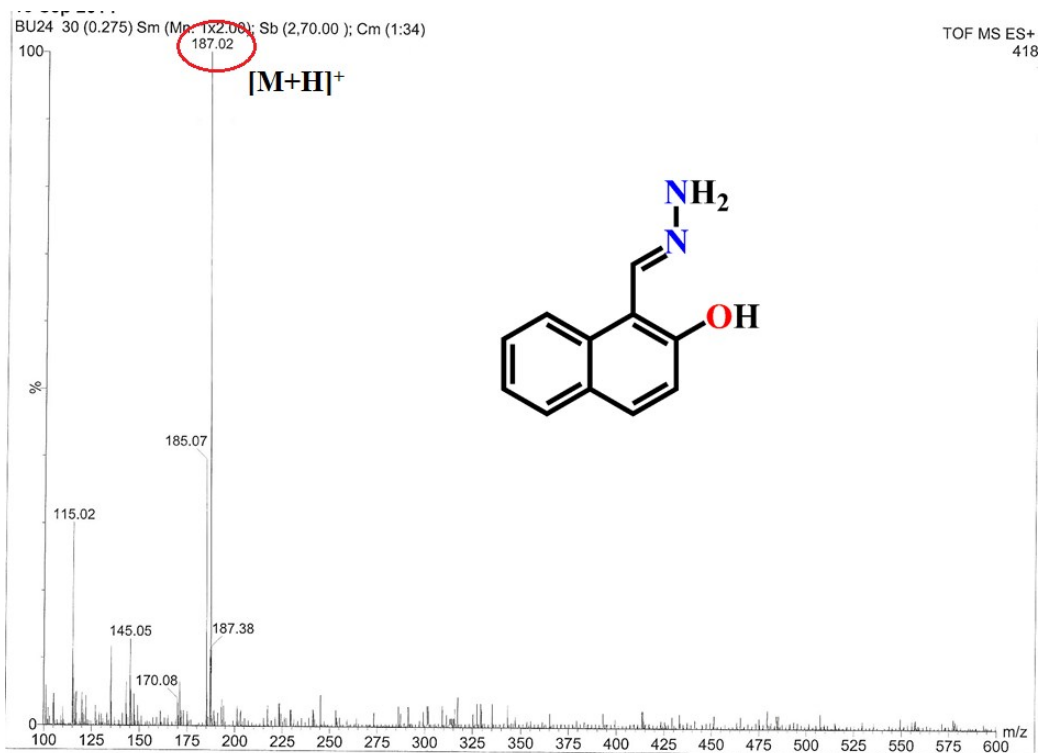

**Fig. S1** Mass spectrum of X1

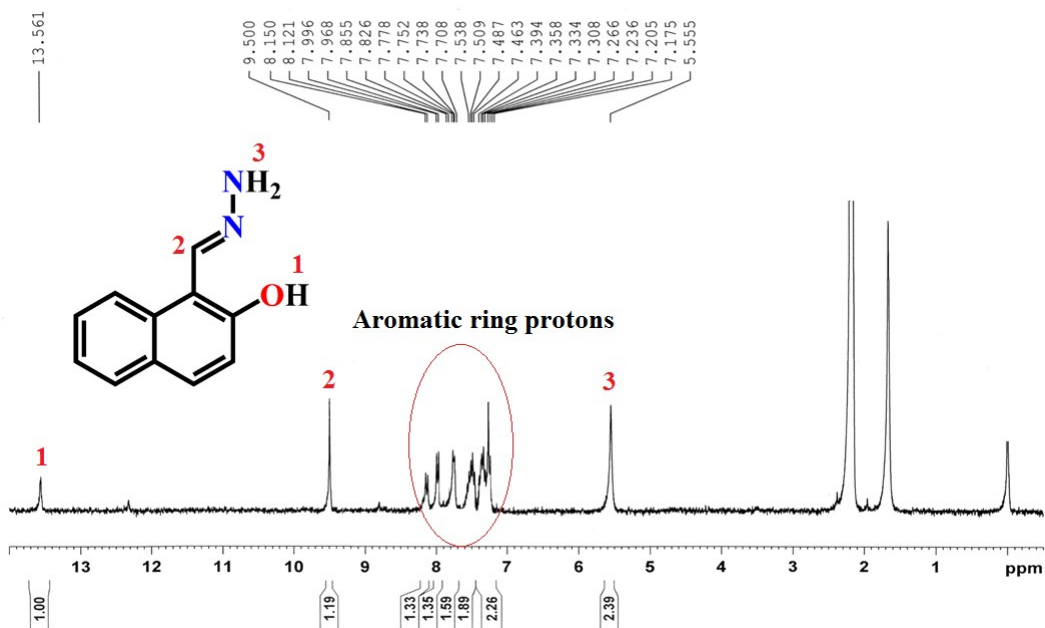

**Fig. S2** <sup>1</sup>H NMR spectrum of X1 in CDCl<sub>3</sub>

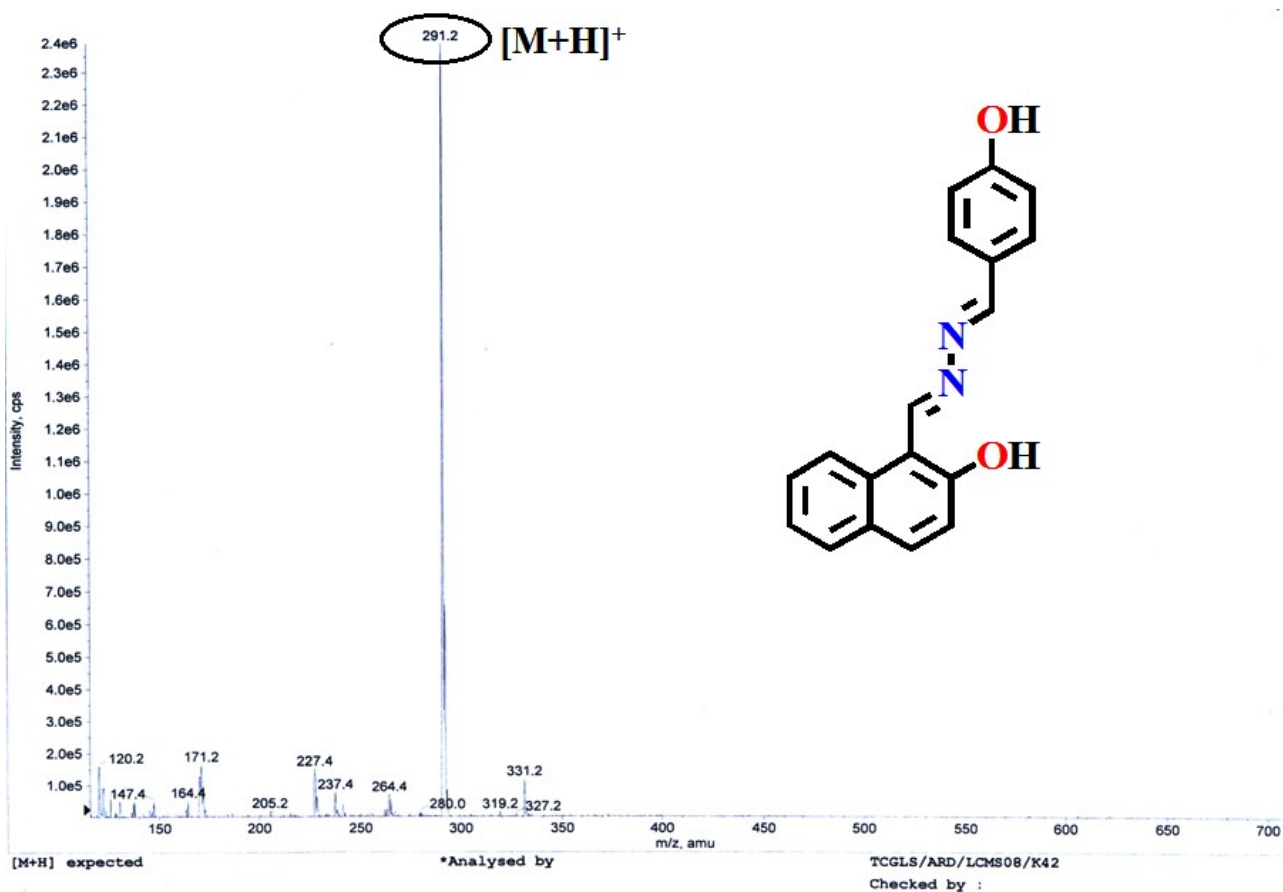

Fig. S3 Mass spectrum of A4

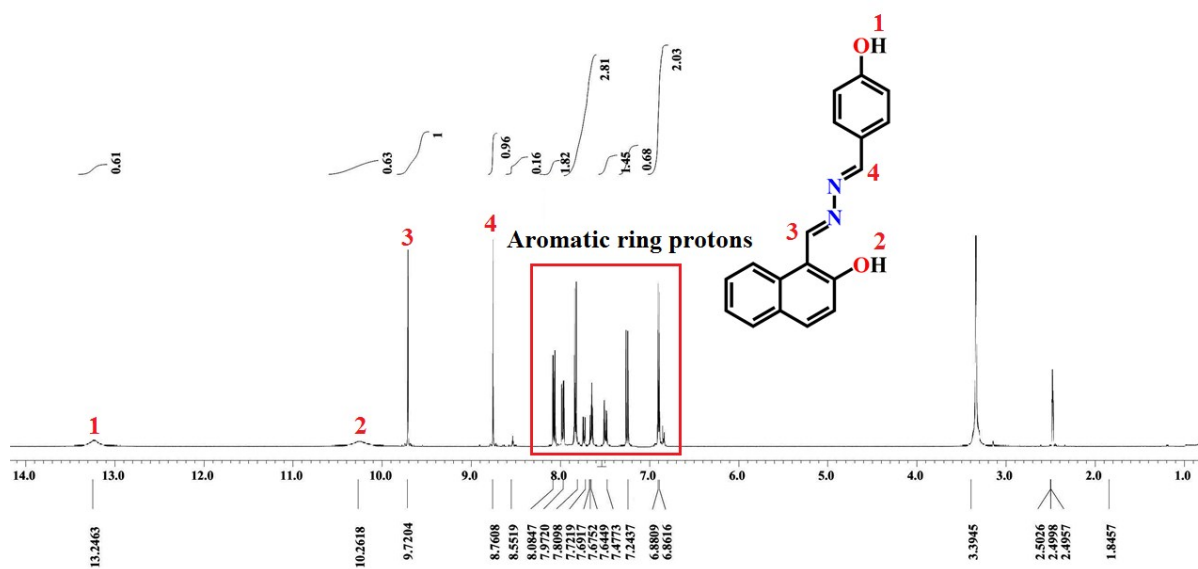

Fig. S4 <sup>1</sup>H NMR spectrum of A4 in DMSO-d<sub>6</sub>

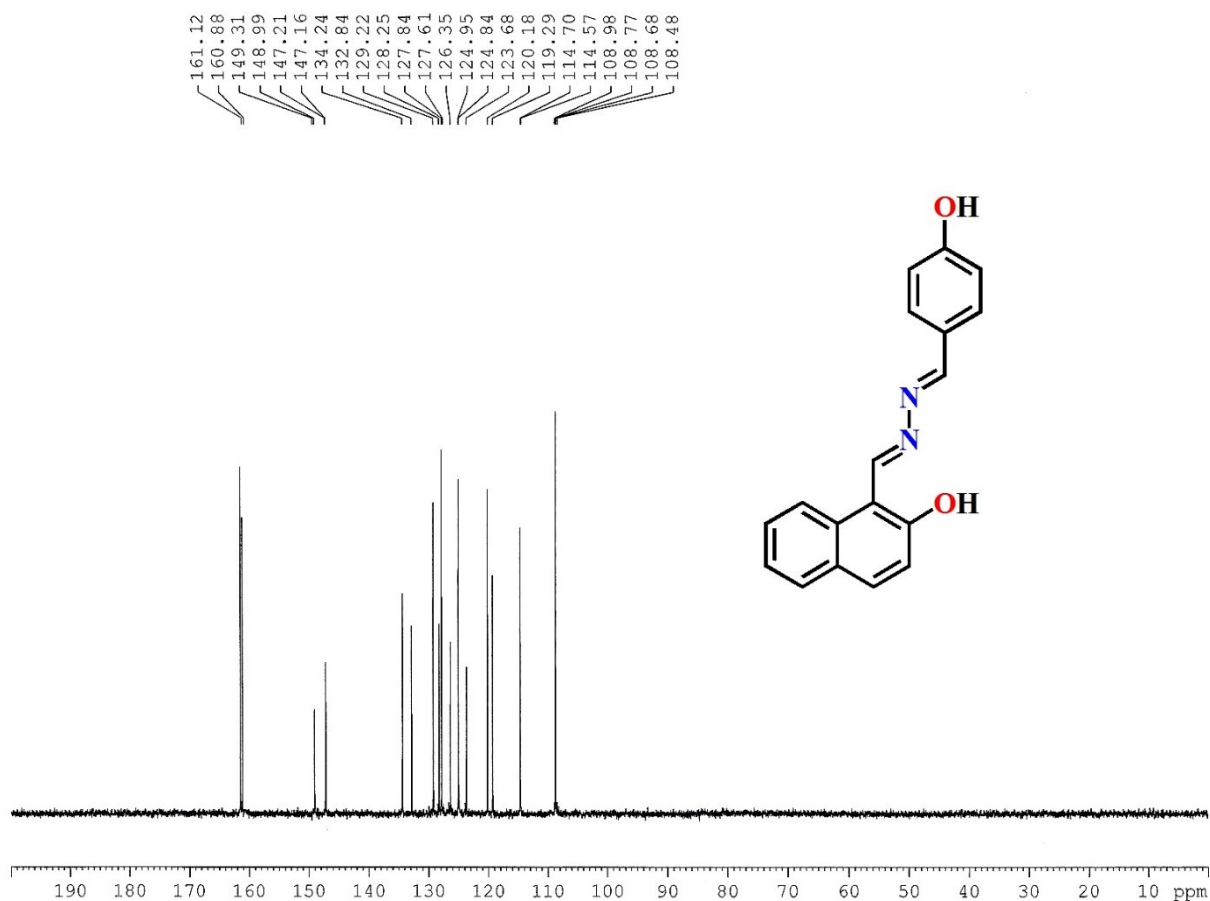

Fig. S5 <sup>13</sup>C NMR spectrum of A4 in CDCl<sub>3</sub>

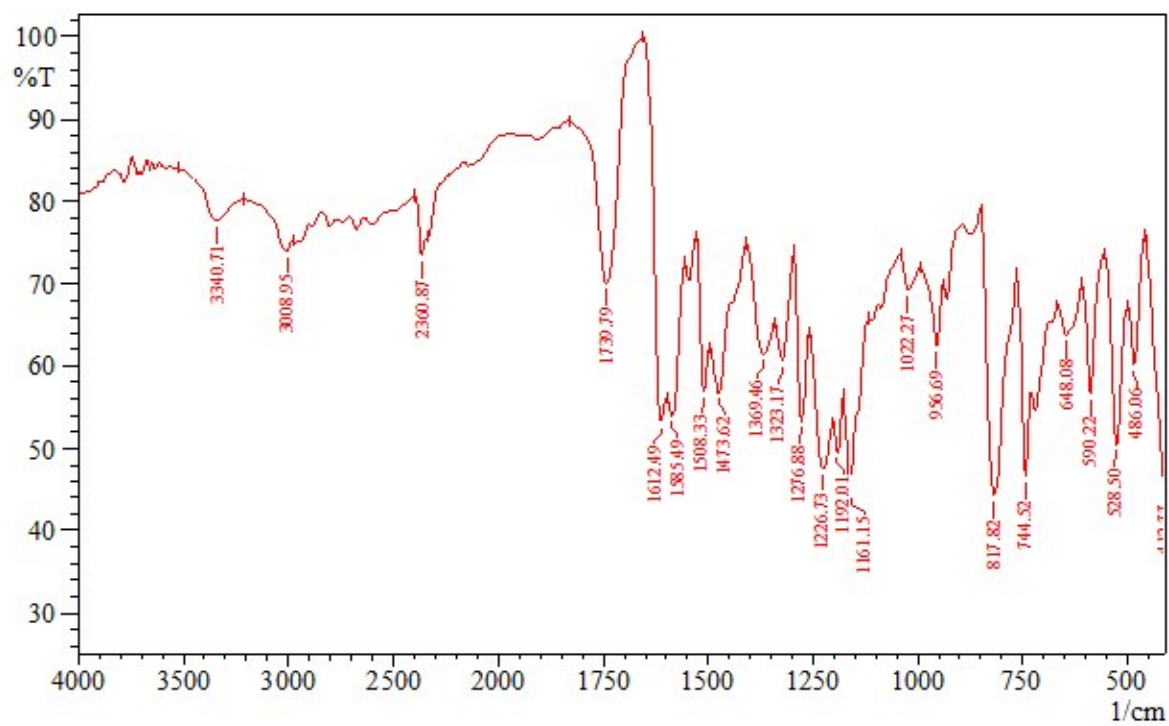

Fig. S6 FTIR spectrum of A4

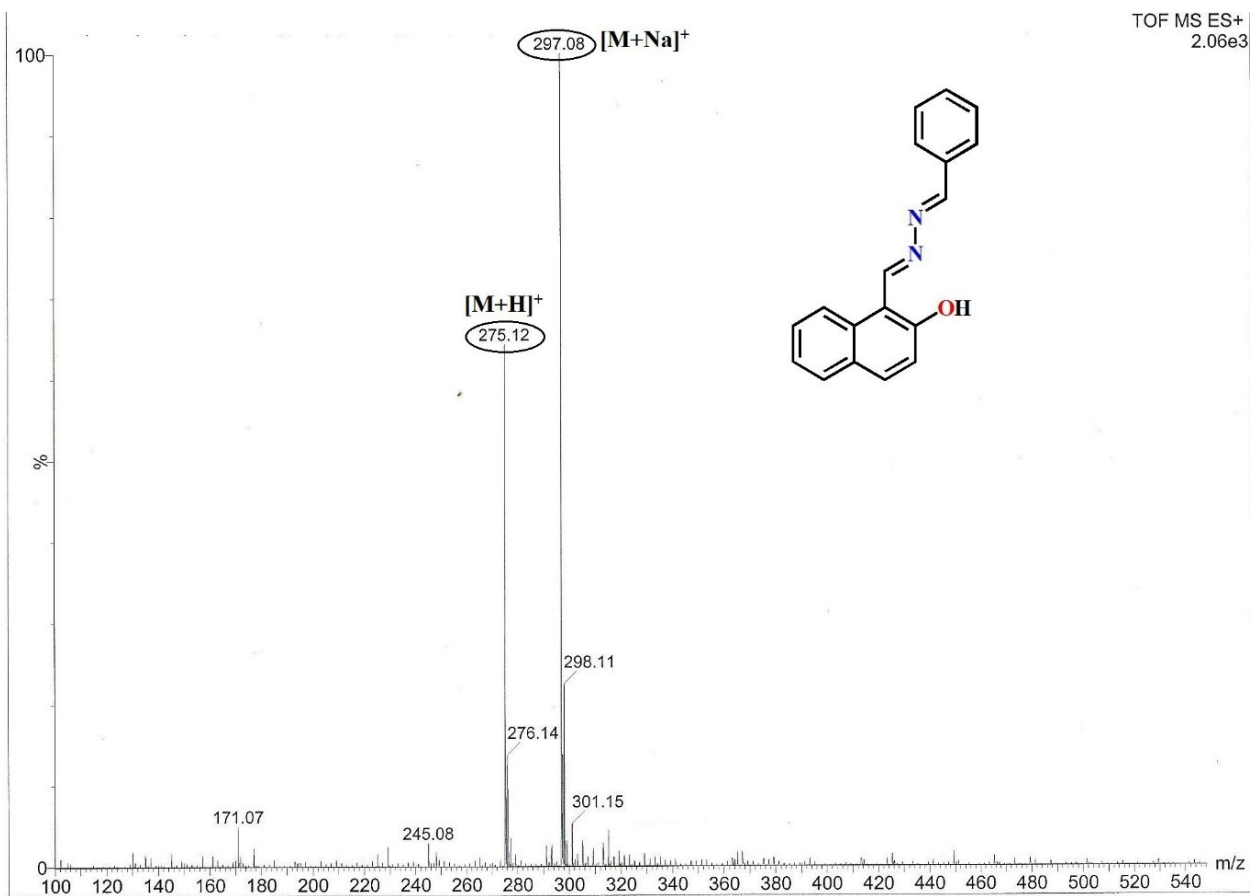

Fig. S7 Mass spectrum of A5

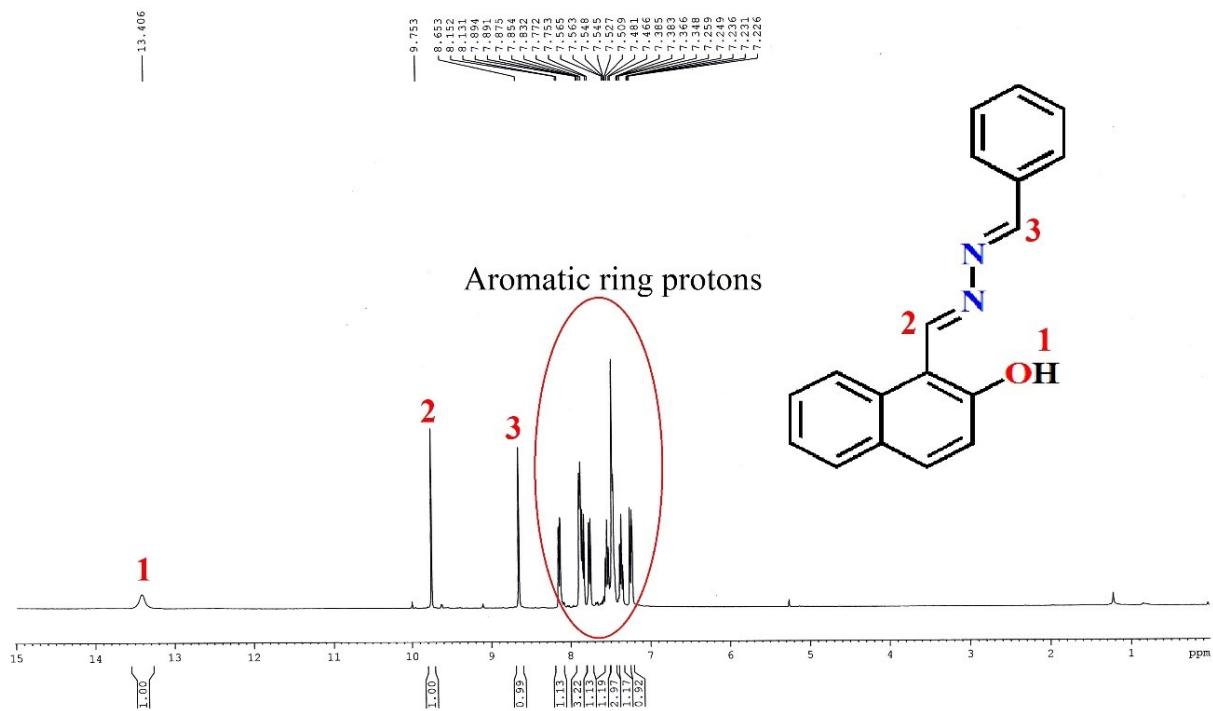

Fig. S8 <sup>1</sup>H NMR spectrum of A5 in CDCl<sub>3</sub>

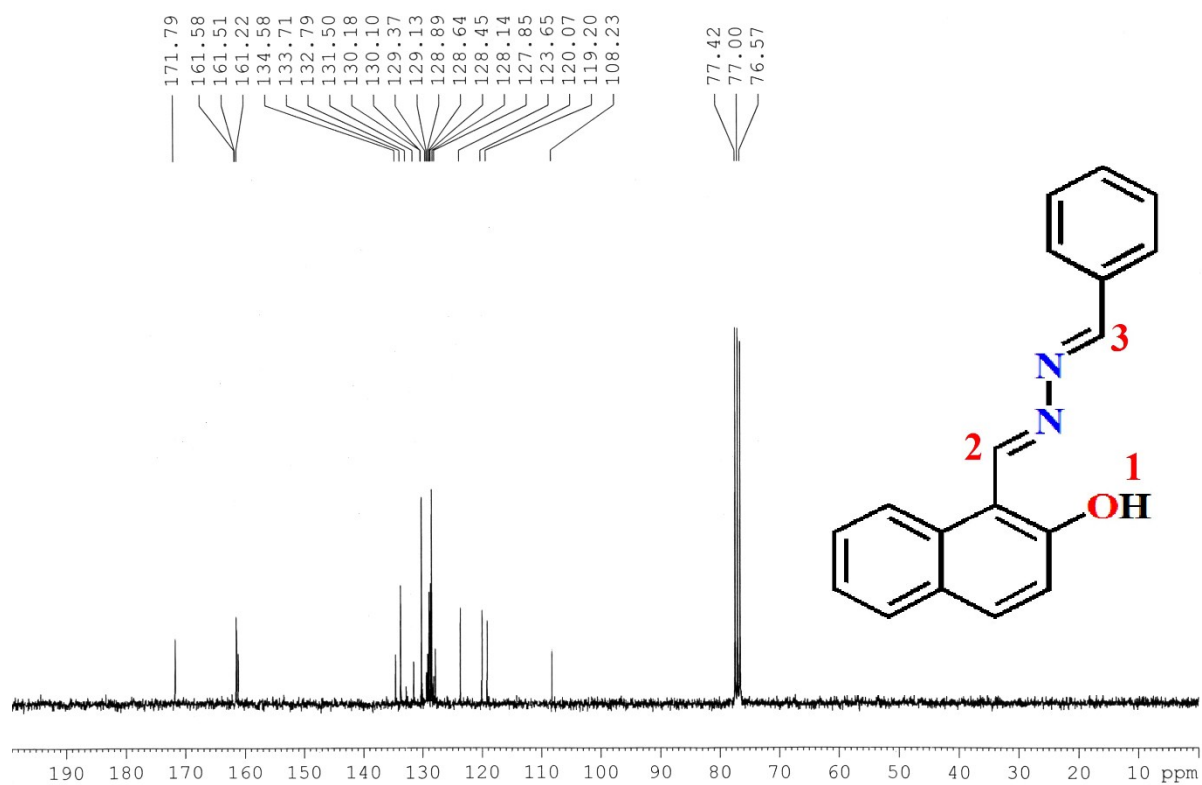

Fig. S9 <sup>13</sup>C NMR spectrum of A5 in CDCl<sub>3</sub>

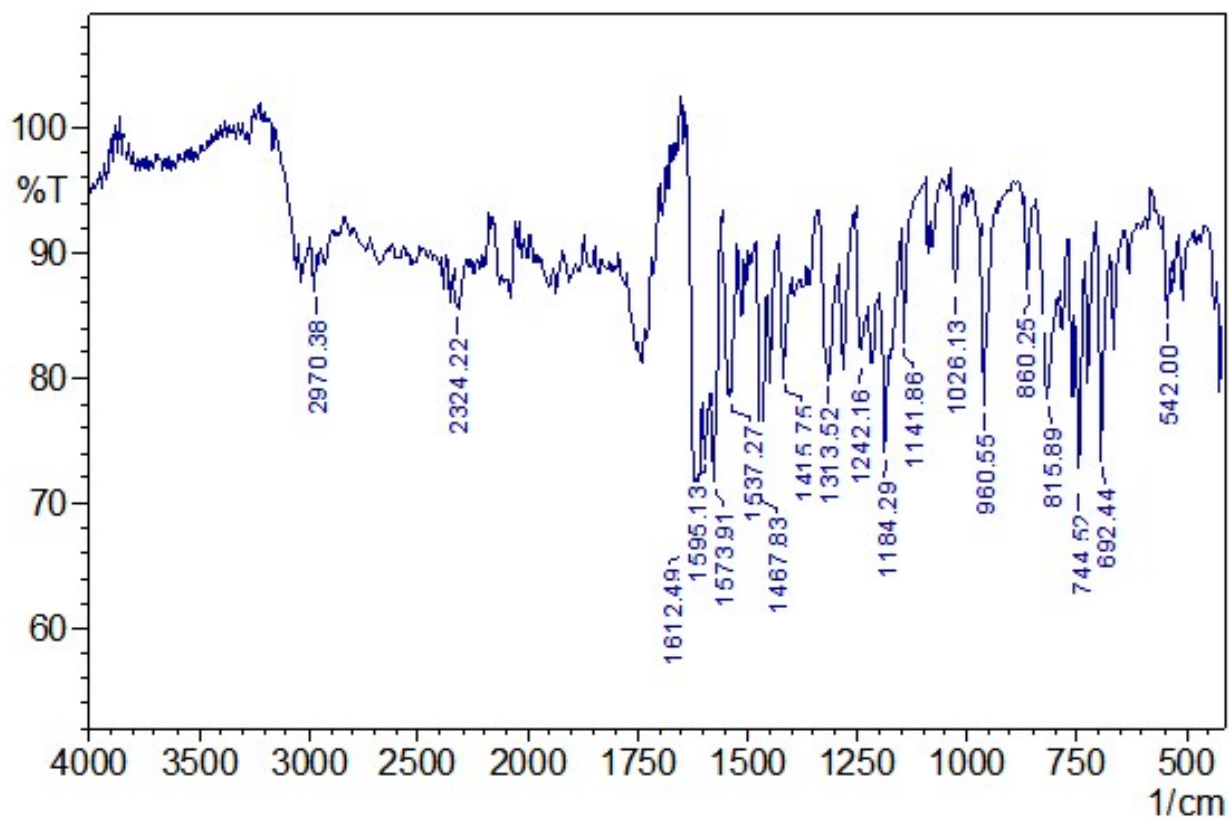

Fig. S10 FTIR spectrum of A5

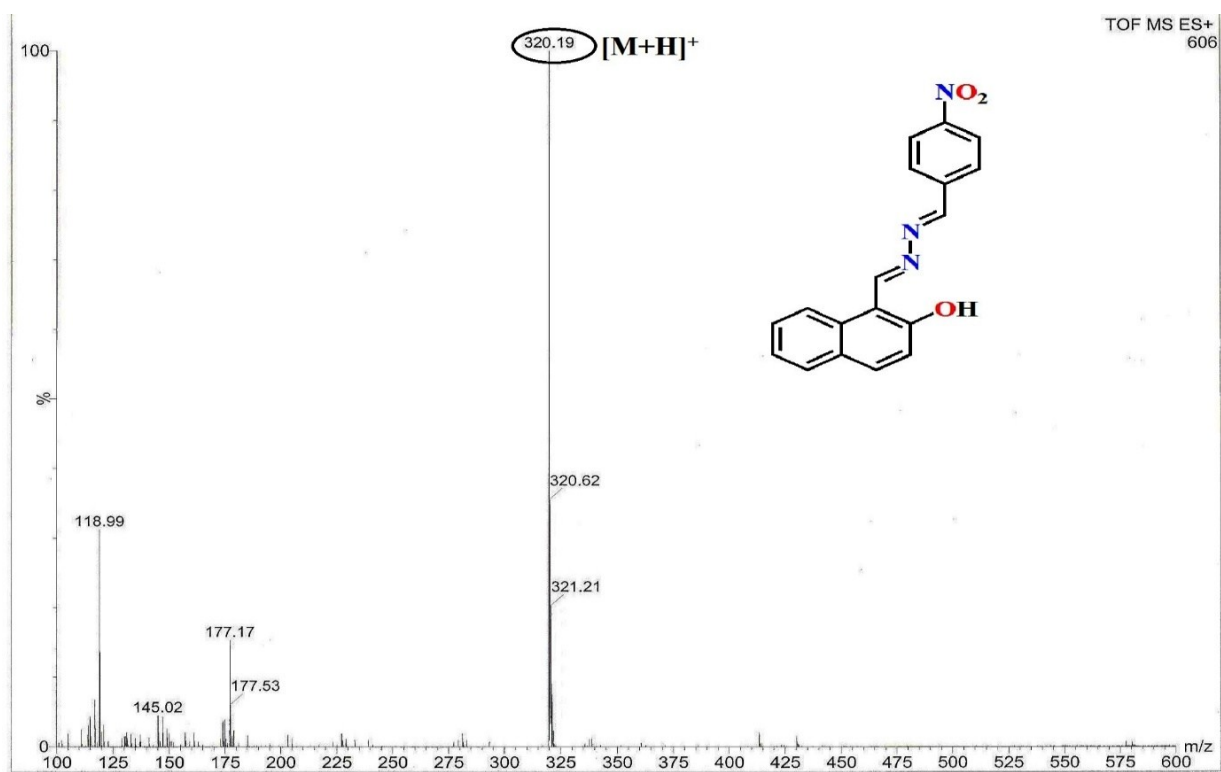

Fig. S11 Mass spectrum of A6

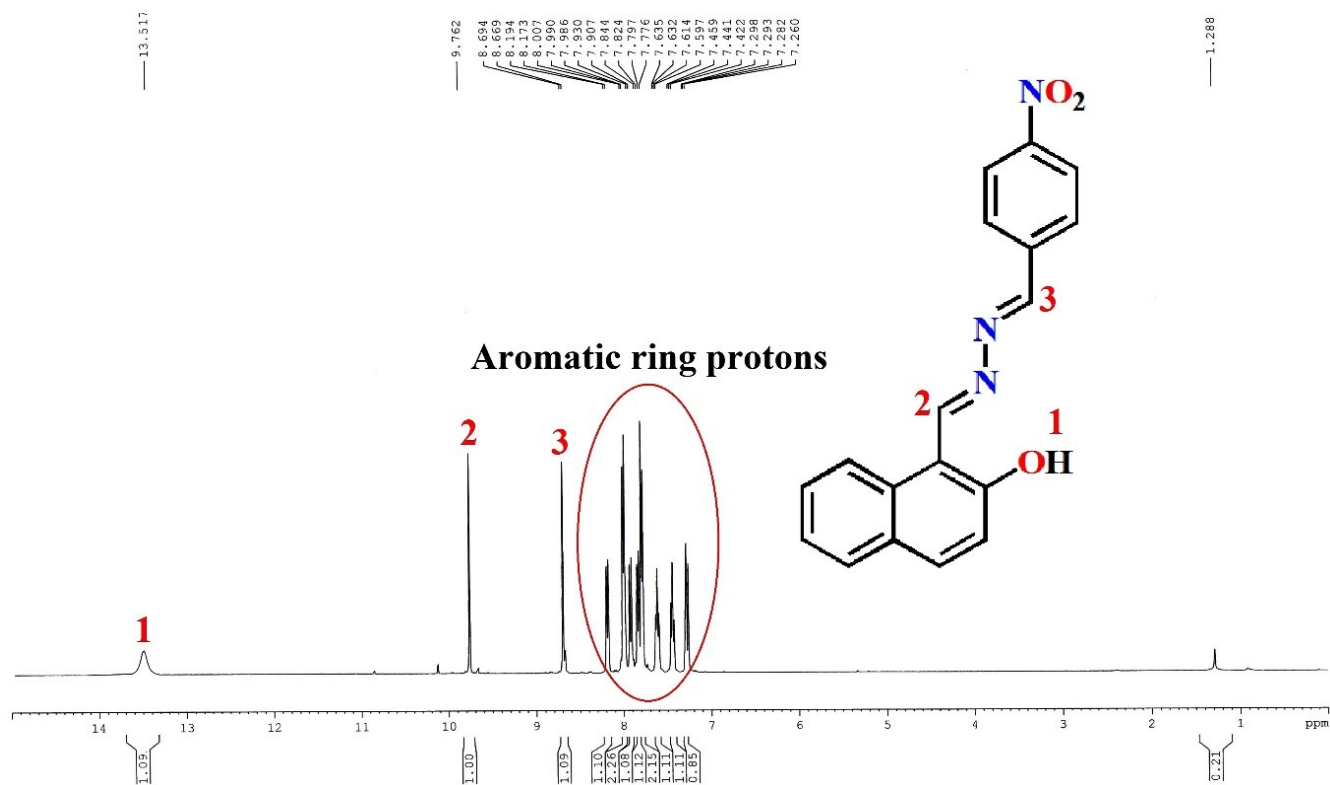

Fig. S12 <sup>1</sup>H NMR spectrum of A6 in CDCl<sub>3</sub>



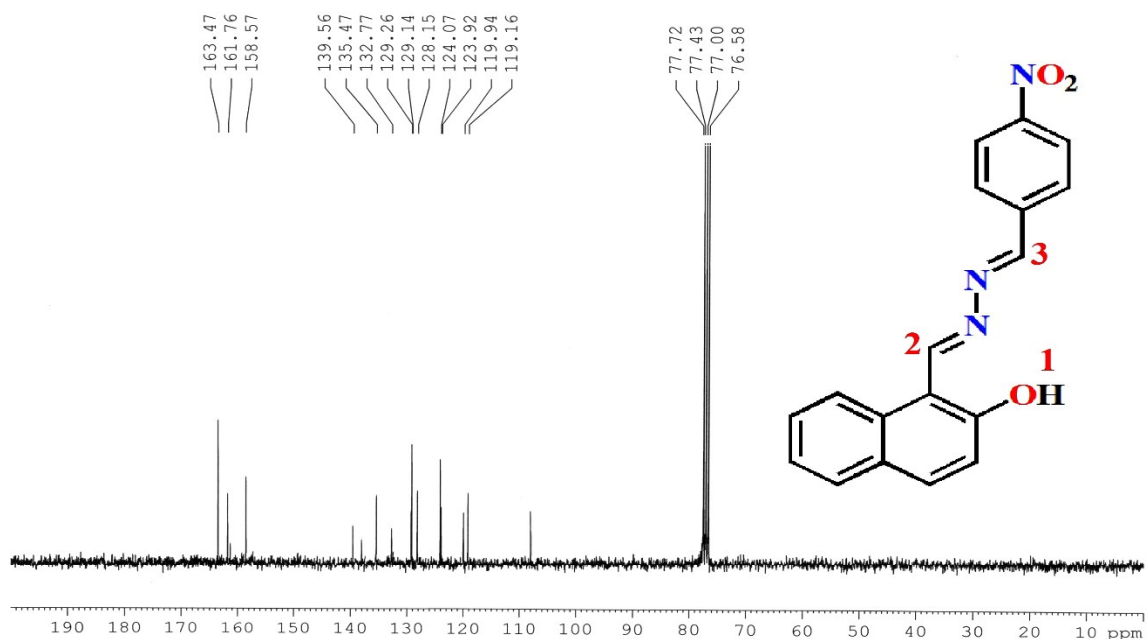

Fig. S13 <sup>13</sup>C NMR spectrum of A6 in CDCl<sub>3</sub>

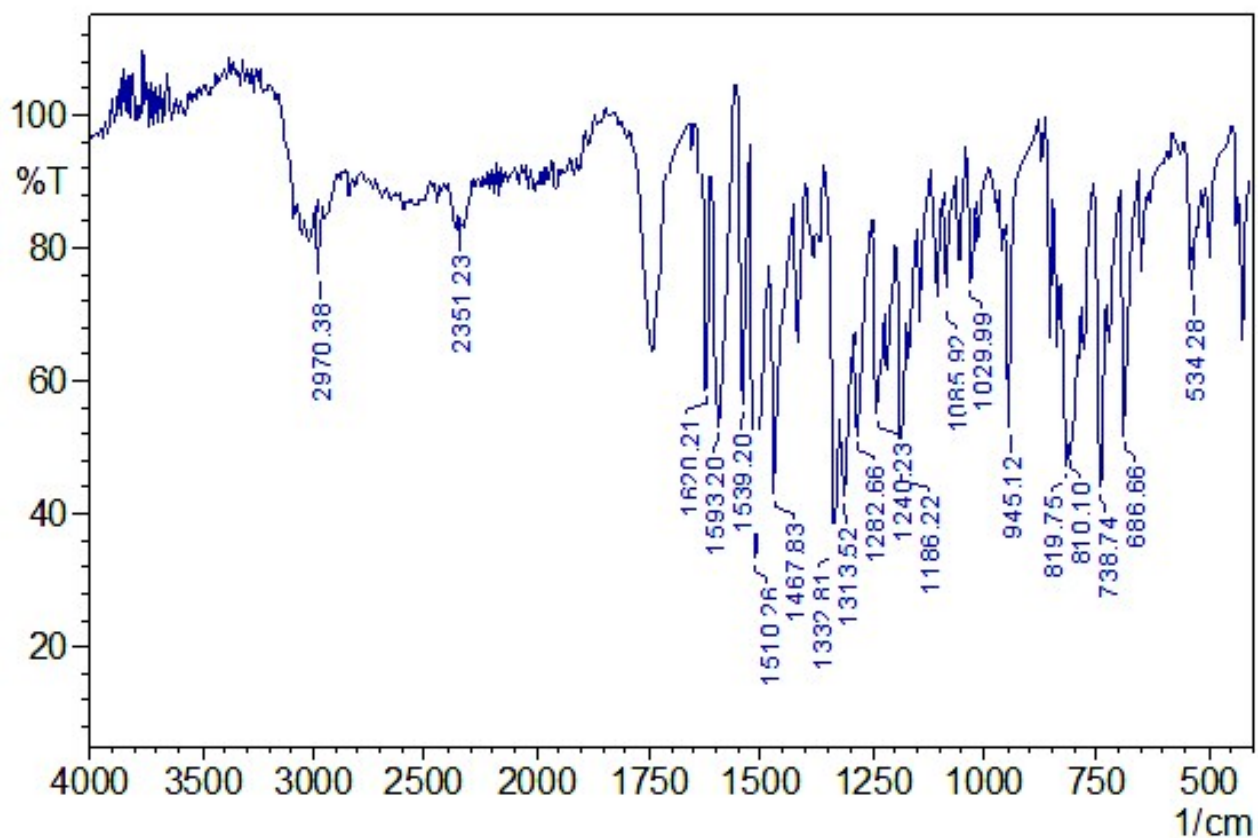

Fig. S14 FTIR spectrum of A6

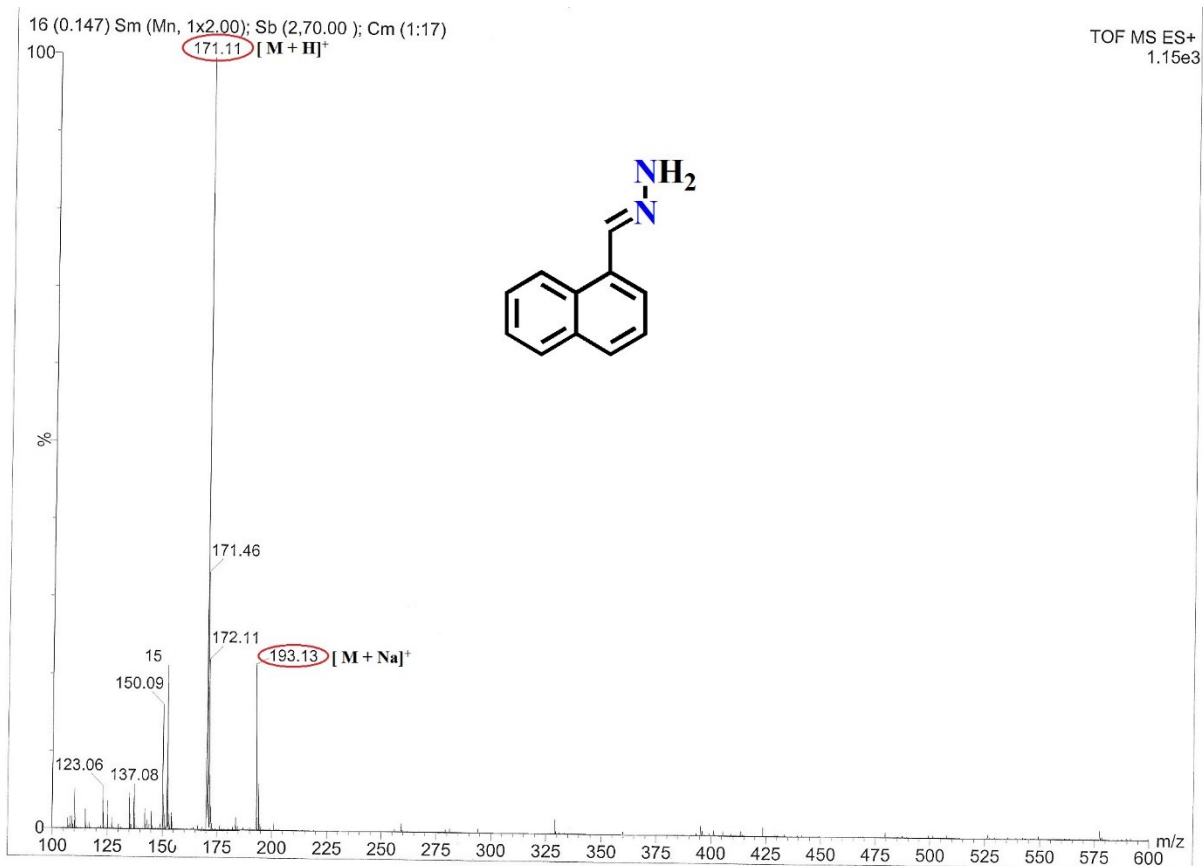

Fig. S15 Mass spectrum of X2

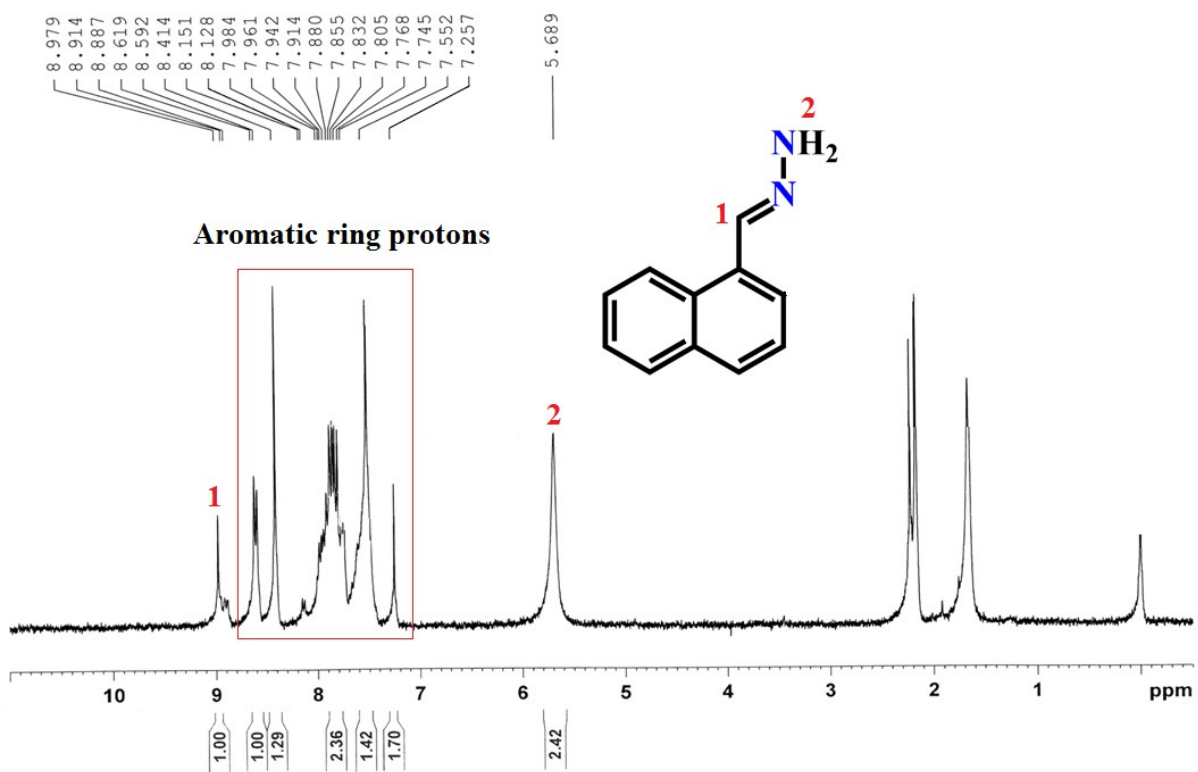

Fig. S16 <sup>1</sup>H NMR spectrum of X2 in CDCl<sub>3</sub>

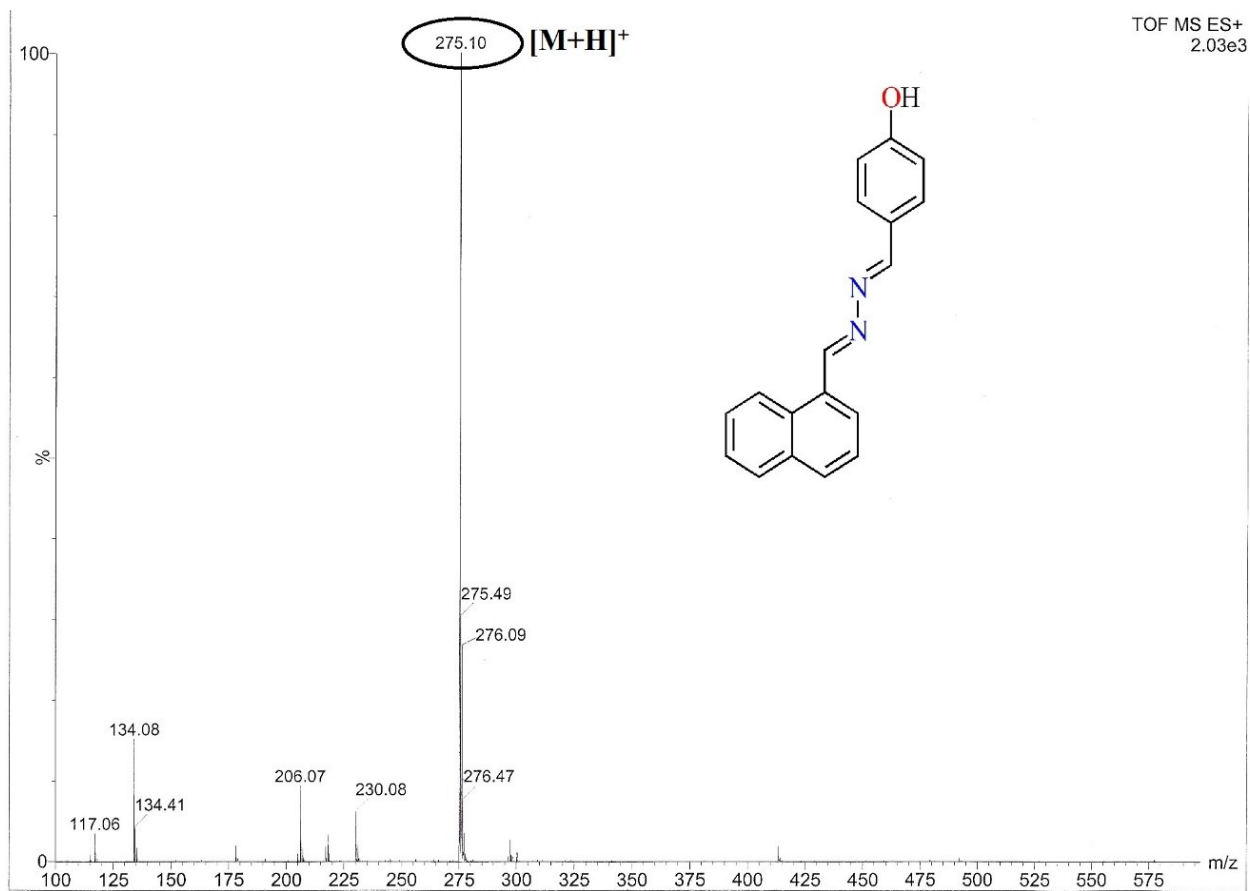

Fig. S17 Mass spectrum of A4a

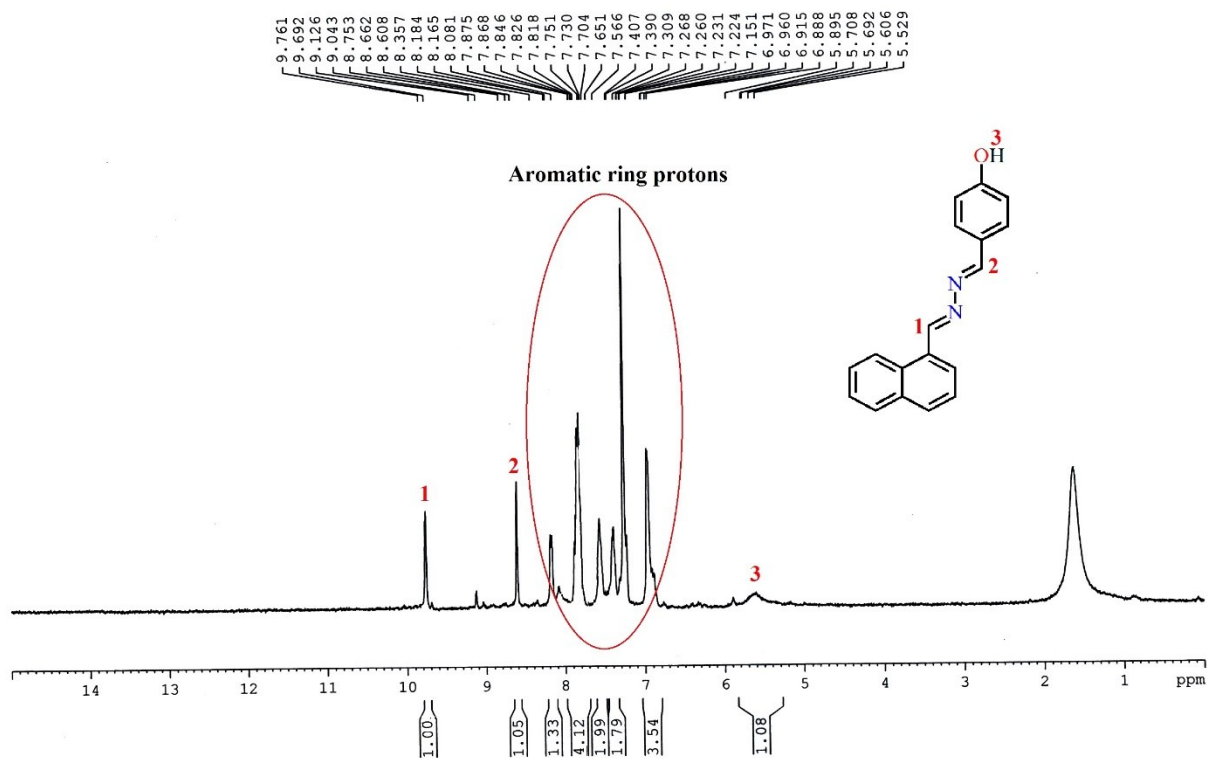

Fig. S18  $^1\text{H}$  NMR spectrum of A4a in  $\text{CDCl}_3$

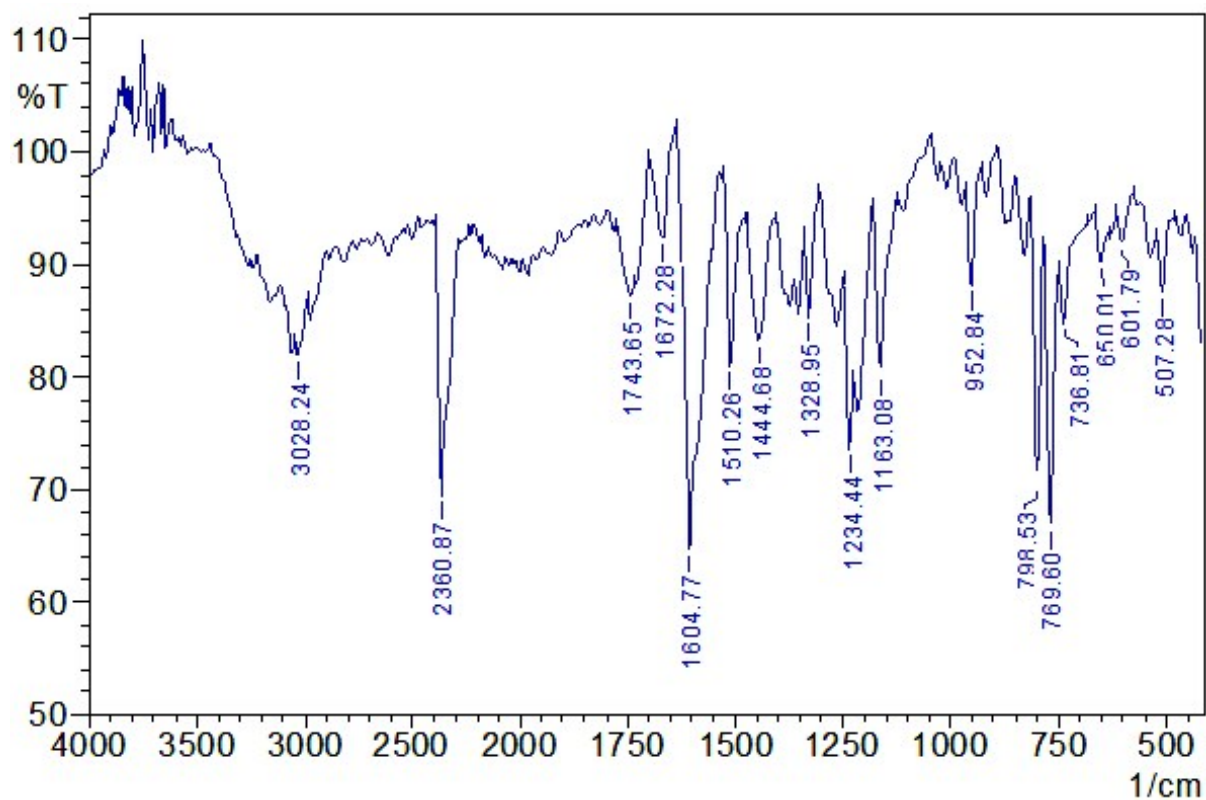

Fig. S19 FTIR spectrum of A4a

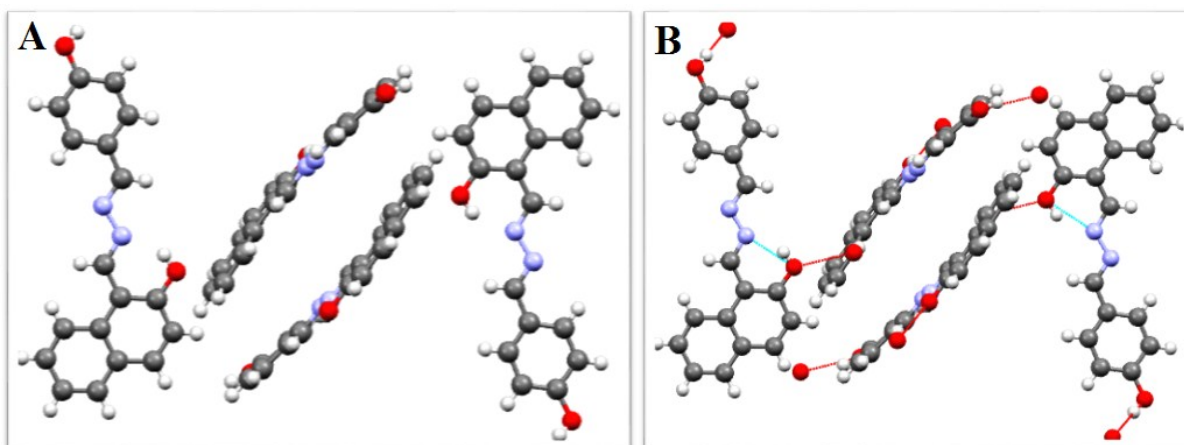

**Fig. S20** (A) Crystal packing and (B) H-bonding network of A4

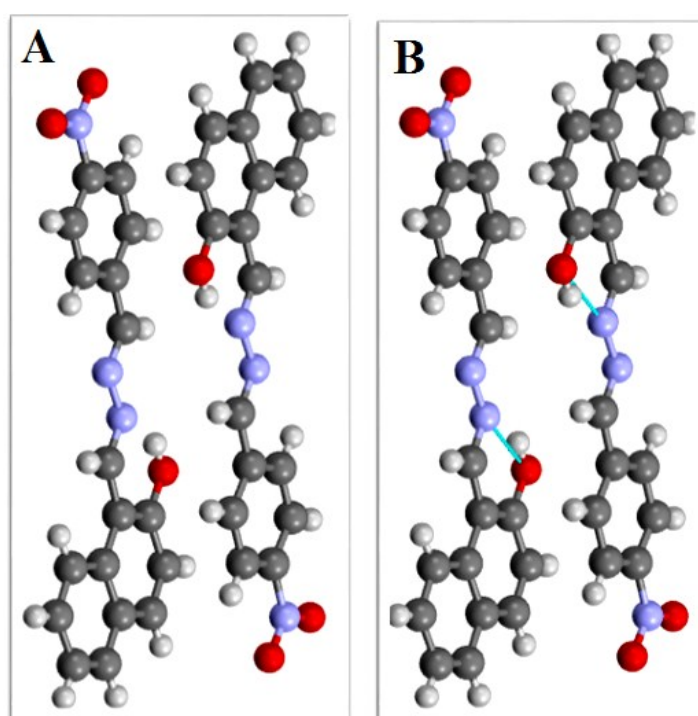

**Fig. S21** (A) Crystal packing and (B) H-bonding network of A6

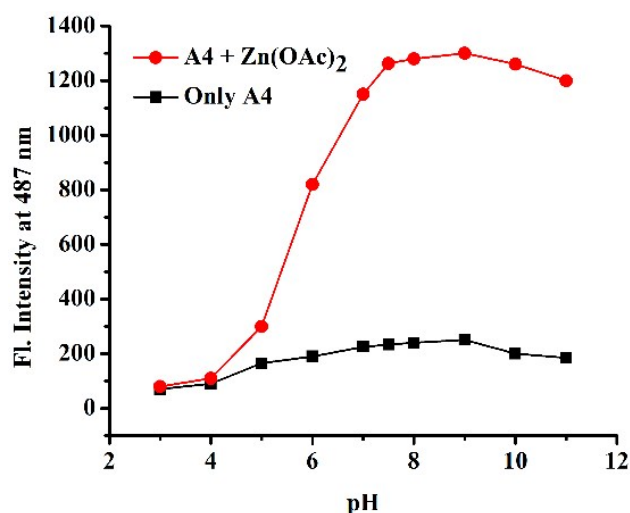

**Fig. S22** Effect of pH on the emission intensities of A4 (10  $\mu\text{M}$ ) before and after addition of  $\text{Zn}(\text{OAc})_2$  (400 equiv.),  $\lambda_{\text{ex}} = 370 \text{ nm}$ ;  $\lambda_{\text{em}} = 487 \text{ nm}$

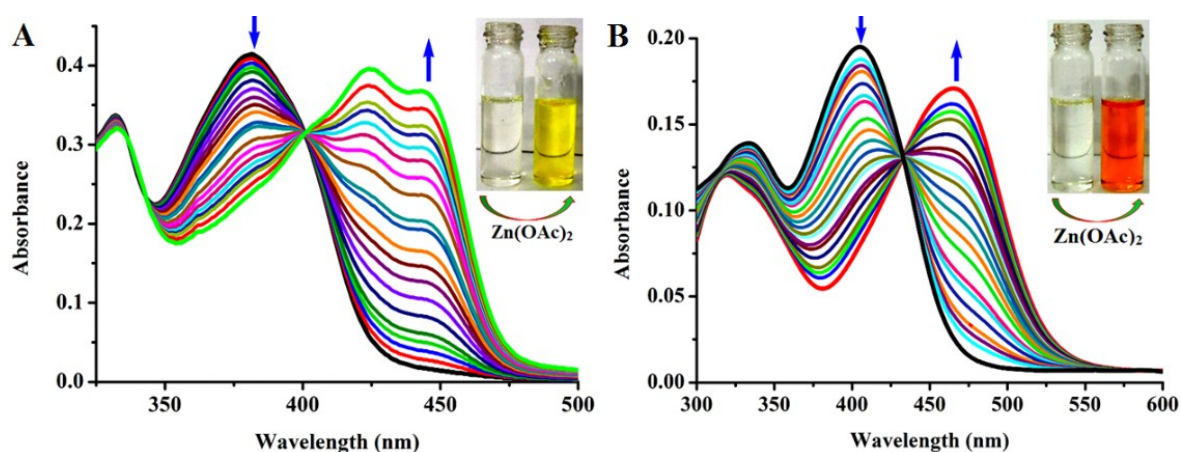

**Fig. S23** Changes in the absorption spectra of [A] A5 (10  $\mu\text{M}$ ) and [B] A6 (10  $\mu\text{M}$ ) (DMSO– water (9: 1, v/v, 0.1 M HEPES buffer, pH 7.4) upon gradual addition of  $\text{Zn}(\text{OAc})_2$  (0–300  $\mu\text{M}$ ). Inset: the naked eye view of A5 and A6 before and after addition of  $\text{Zn}(\text{OAc})_2$

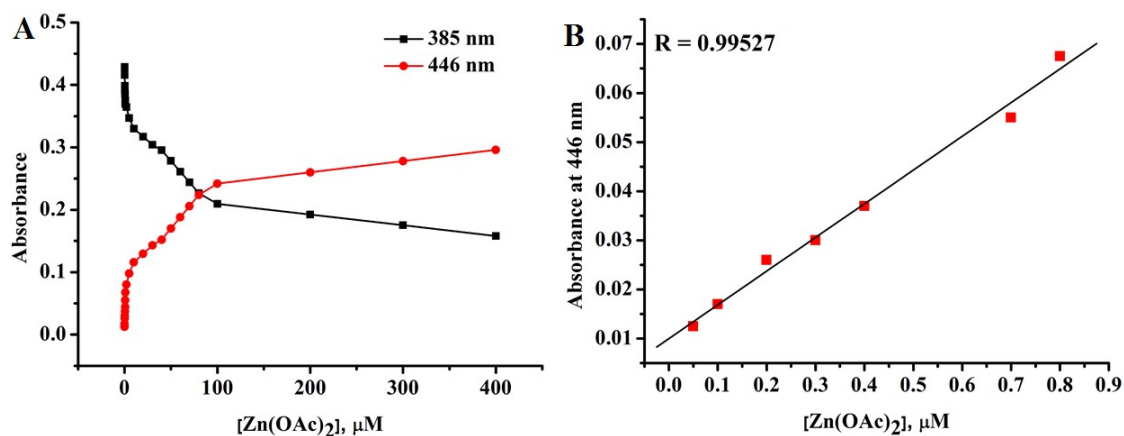

**Fig. S24** Absorbance of A4 (10  $\mu\text{M}$ , DMSO– water (9: 1, v/v, 0.1 M HEPES buffer, pH 7.4) as a function of added  $\text{Zn}(\text{OAc})_2$  (0– 400  $\mu\text{M}$ ). Linear region of the plot (at 446 nm) (right)



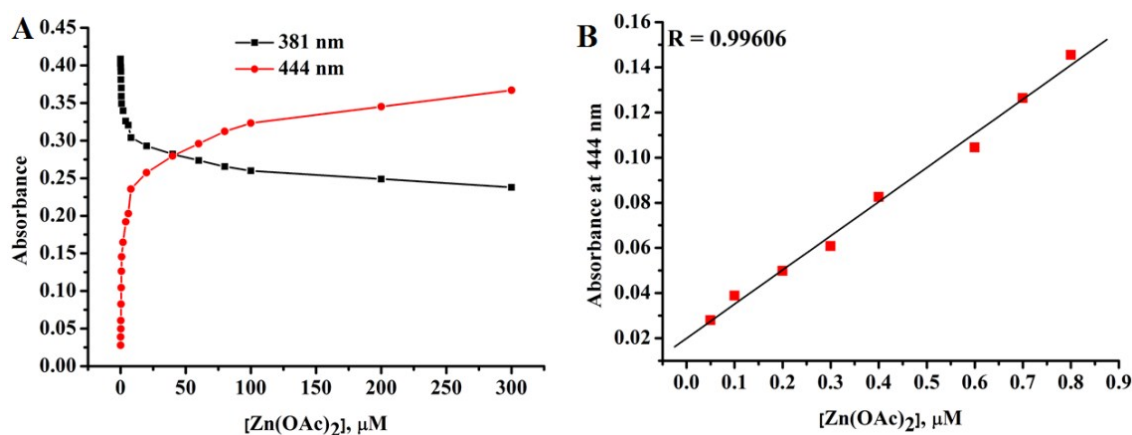

**Fig. S25** Absorbance of A5 (10  $\mu M$ , DMSO– water (9: 1, v/v, 0.1 M HEPES buffer, pH 7.4) as a function of added  $Zn(OAc)_2$  (0- 300  $\mu M$ ). Linear region of the plot (at 444 nm) (right)

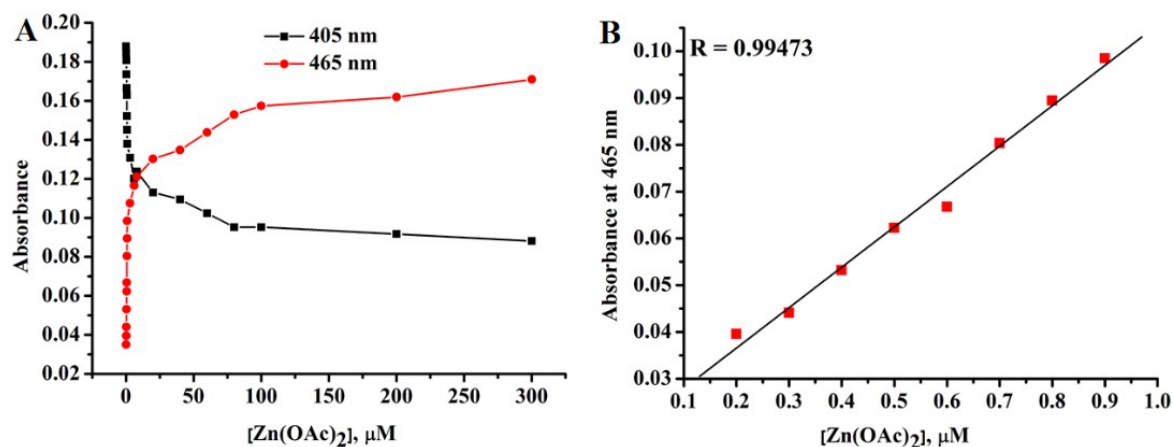

**Fig. S26** Absorbance of A6 (10  $\mu M$ , DMSO– water (9: 1, v/v, 0.1 M HEPES buffer, pH 7.4) as a function of added  $Zn(OAc)_2$  (0- 300  $\mu M$ ). Linear region of the plot (at 465 nm) (right)

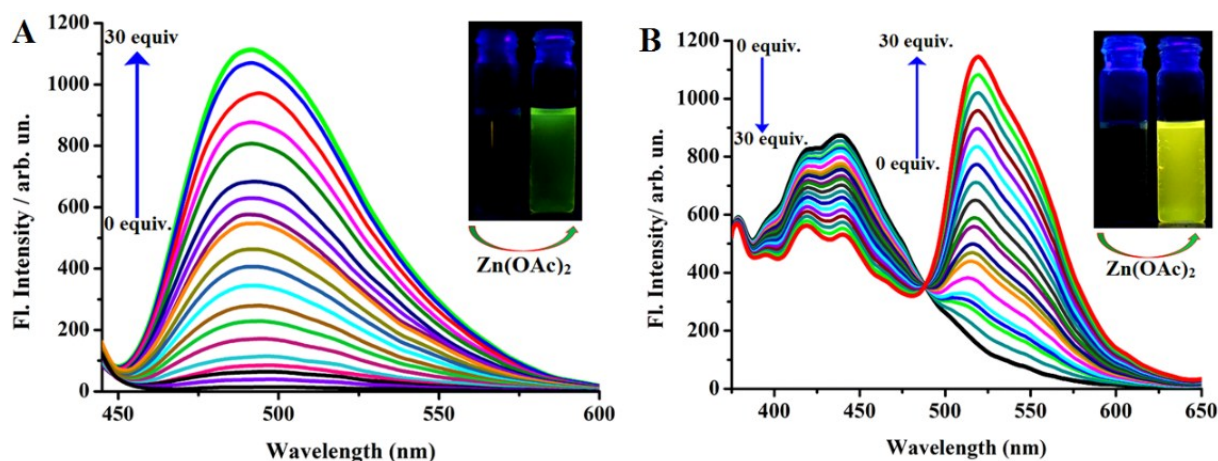

**Fig. S27** Changes in the emission spectra of [A] A5 (10  $\mu M$ ,  $\lambda_{ex}$  430 nm,  $\lambda_{em}$  495 nm) and [B] A6 (10  $\mu M$ ,  $\lambda_{ex}$  337 nm,  $\lambda_{em}$  520 nm) (DMSO– water (9: 1, v/v, 0.1 M HEPES buffer, pH 7.4) upon gradual addition of  $Zn(OAc)_2$  (0-300  $\mu M$ ). Inset: UV light exposed colors of A5 and A6 before and after addition of  $Zn(OAc)_2$

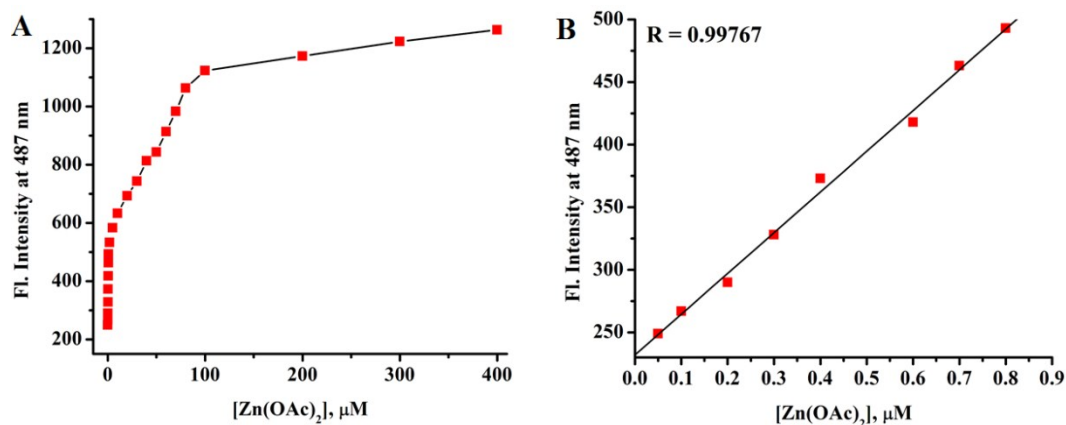

**Fig. S28** Emission intensities of **A4** (10 μM, DMSO–water (9 : 1, v/v, 0.1 M HEPES buffer, pH 7.4,  $\lambda_{\text{ex}}$ , 370 nm;  $\lambda_{\text{em}}$ , 487 nm) as a function of added Zn(OAc)<sub>2</sub> (0- 400 μM). Linear region of the plot (right)

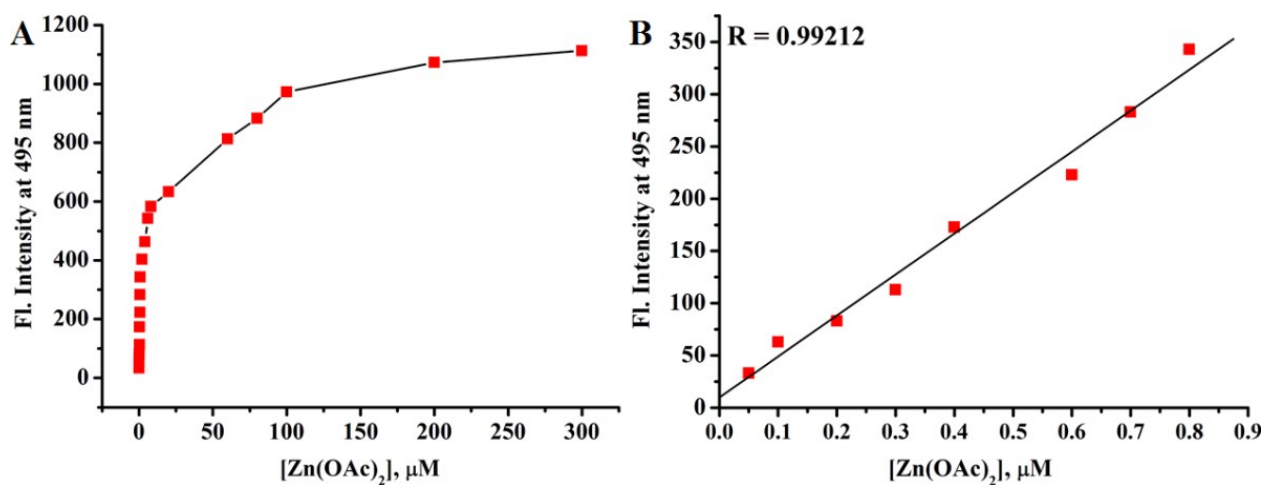

**Fig. S29** Emission intensities of **A5** (10 μM, DMSO– water (9 : 1, v/v, 0.1 M HEPES buffer, pH 7.4,  $\lambda_{\text{ex}}$ , 430 nm;  $\lambda_{\text{em}}$ , 495 nm) as a function of added Zn(OAc)<sub>2</sub> (0- 300 μM). Linear region of the (right)



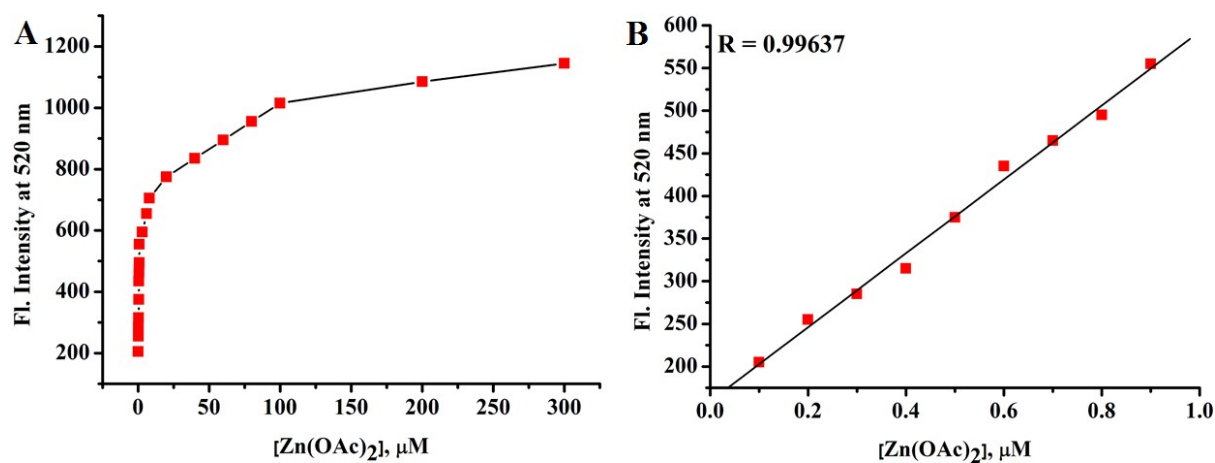

**Fig. S30** Emission intensities of **A6** (10 μM, DMSO– water (9 : 1, v/v, 0.1 M HEPES buffer, pH 7.4,  $\lambda_{\text{ex}}$ , 337 nm;  $\lambda_{\text{em}}$ , 520 nm) as a function of added Zn(OAc)<sub>2</sub> (0- 300 μM). Linear region of the (right)

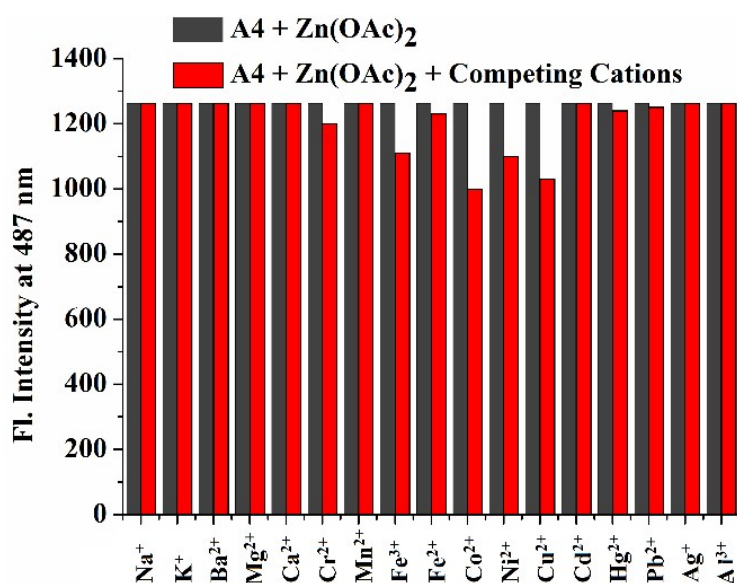

**Fig. S31** Effect of common cations on the emission intensities of [A4 + Zn(OAc)<sub>2</sub>] system (DMSO– water, 9 : 1, v/v, 0.1 M HEPES buffer, pH 7.4,  $\lambda_{\text{ex}}$ , 370 nm;  $\lambda_{\text{em}}$ , 487 nm)

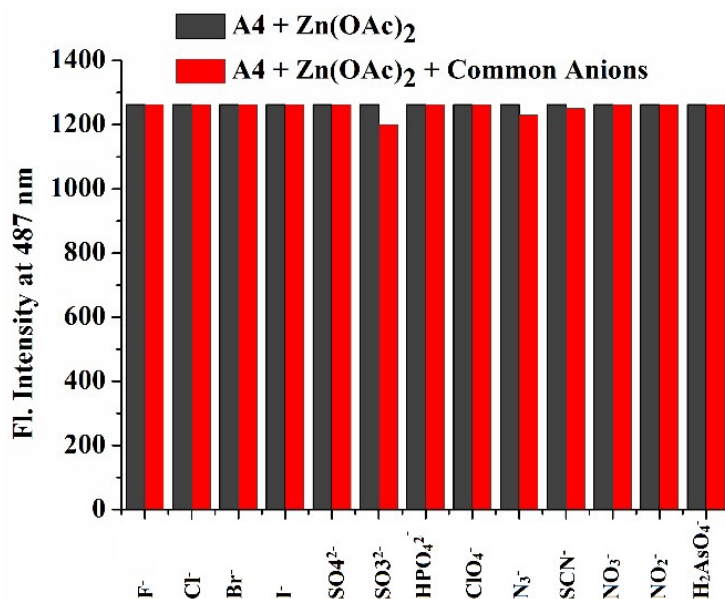

**Fig. S32** Effect of common anions on the emission intensities of [A4 + Zn(OAc)<sub>2</sub>] system (DMSO–water, 9 : 1, v/v, 0.1 M HEPES buffer, pH 7.4,  $\lambda_{\text{ex}}$ , 370 nm;  $\lambda_{\text{em}}$ , 487 nm)

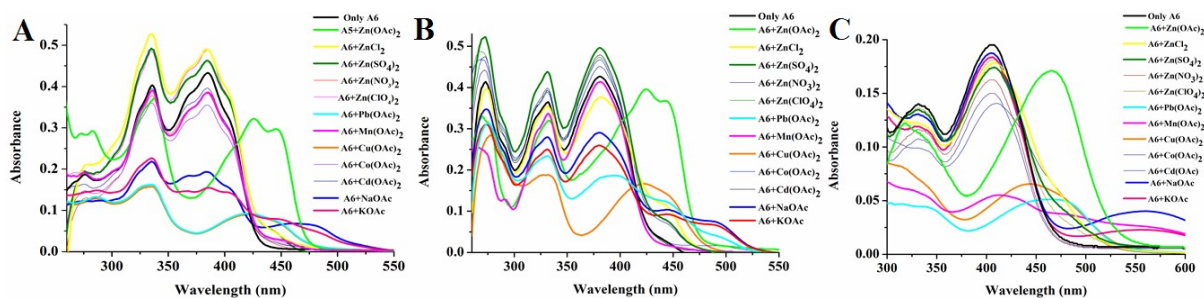

**Fig. S33** Effect of equi molar of other salts (including the acetate salts with different metal ions and the zinc salts with different anions) on the absorption spectra of A4, A5 and A6 (left to right).

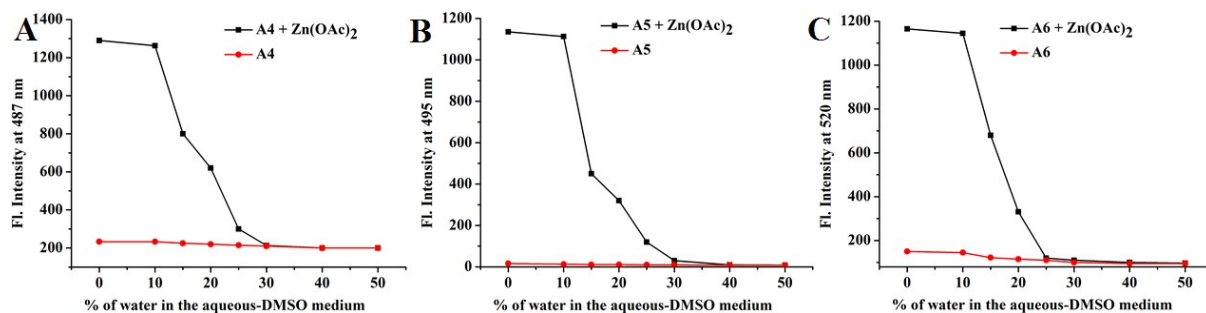

**Fig. S34** Effects of increasing water contents of the aqueous-DMSO medium on emission character of A4, A5 and A6 and their ZA adducts (left to right).

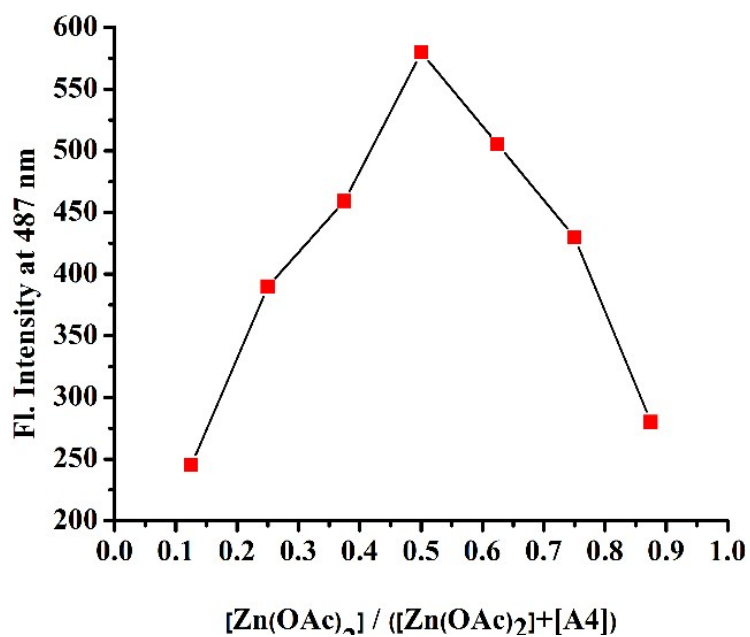

**Fig. S35** Job's plot for determination of stoichiometry of the  $[\text{A4} + \text{Zn(OAc)}_2]$  adduct in DMSO-water, 9 : 1, v/v, 0.1 M HEPES buffer, pH 7.4,  $\lambda_{\text{ex}}$ , 370 nm;  $\lambda_{\text{em}}$ , 487 nm)

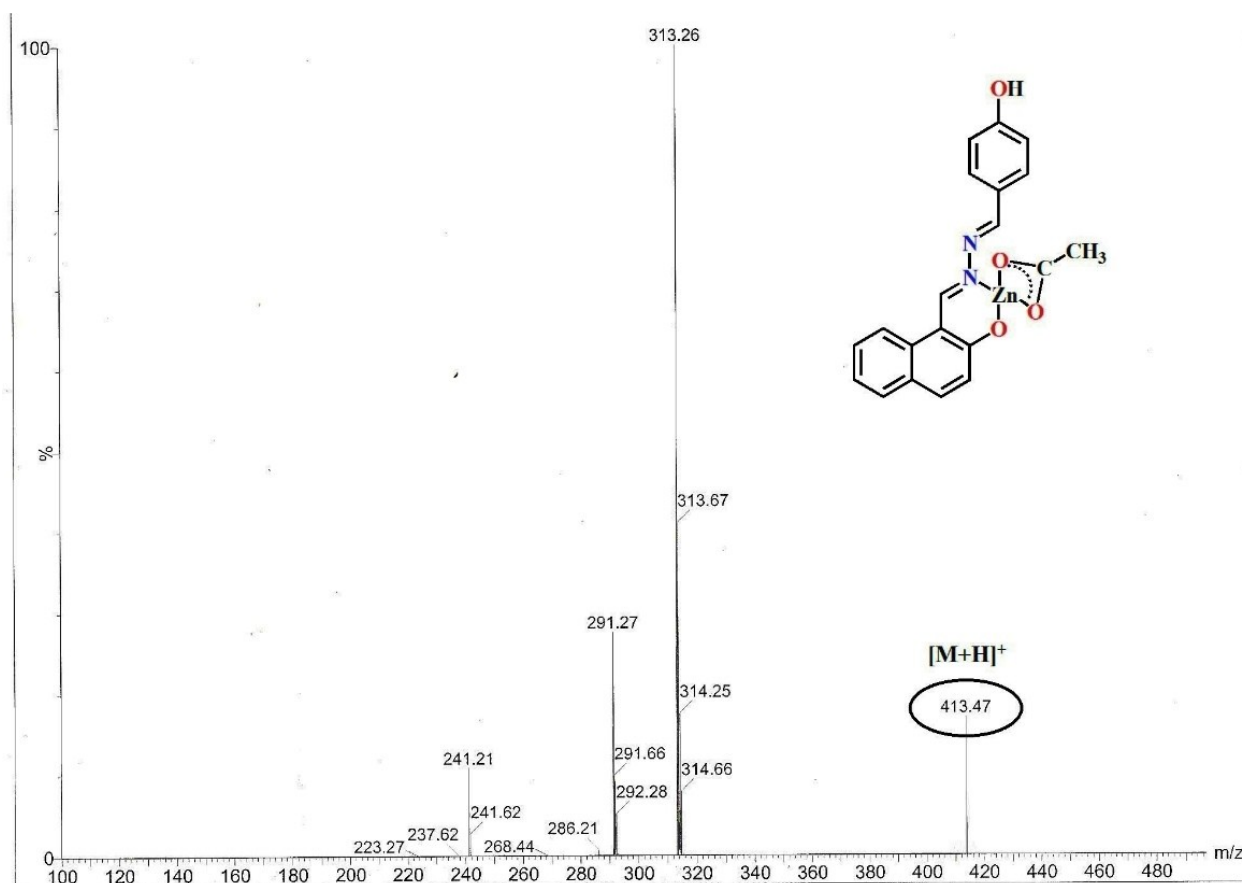

**Fig. S36** QTOF-MS(+) spectrum of  $[\text{A4-Zn(OAc)}_2]$  adduct

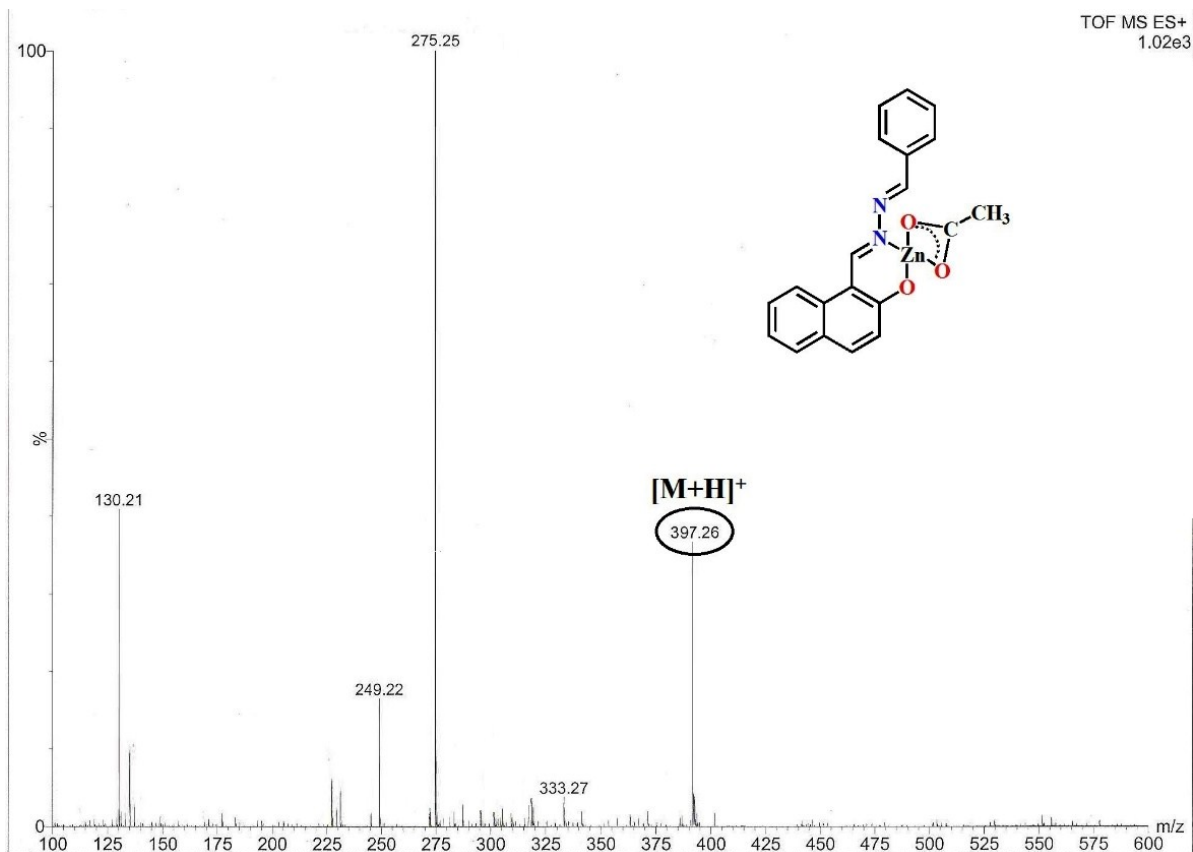

**Fig. S37** QTOF-MS(+) spectrum of [A5-Zn(OAc)<sub>2</sub>] adduct

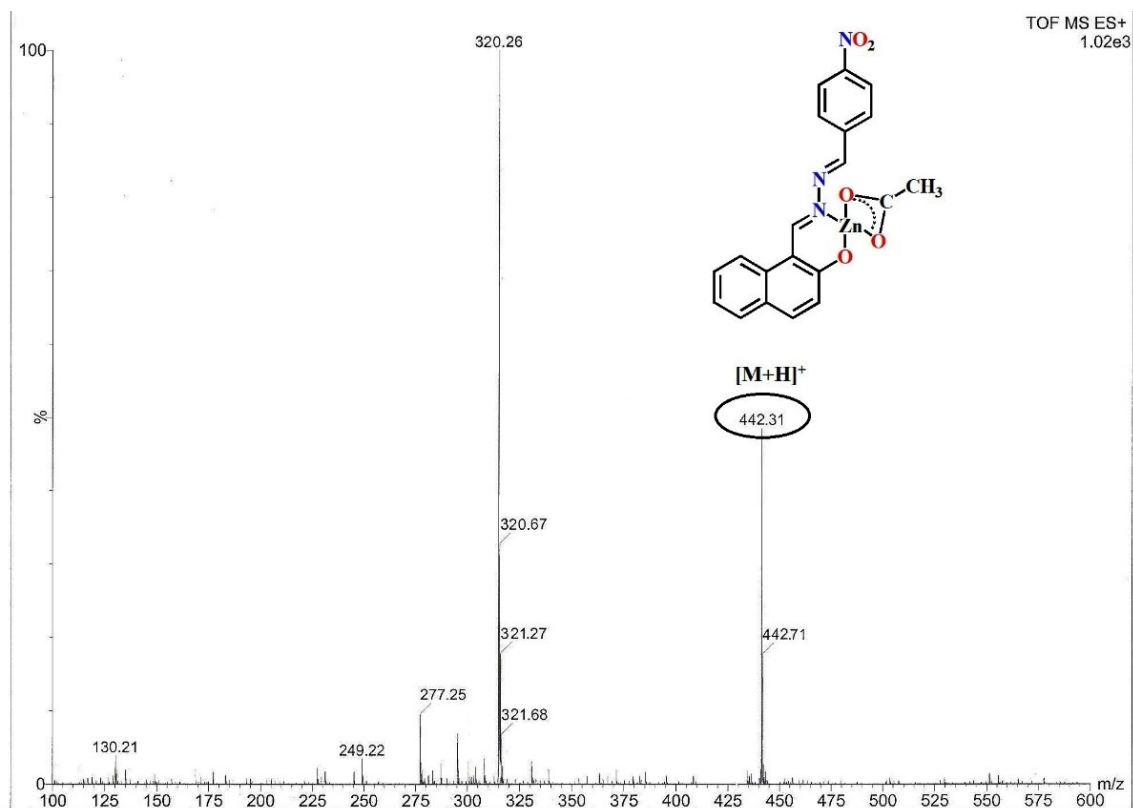

**Fig. S38** QTOF-MS(+) spectrum of [A6-Zn(OAc)<sub>2</sub>] adduct

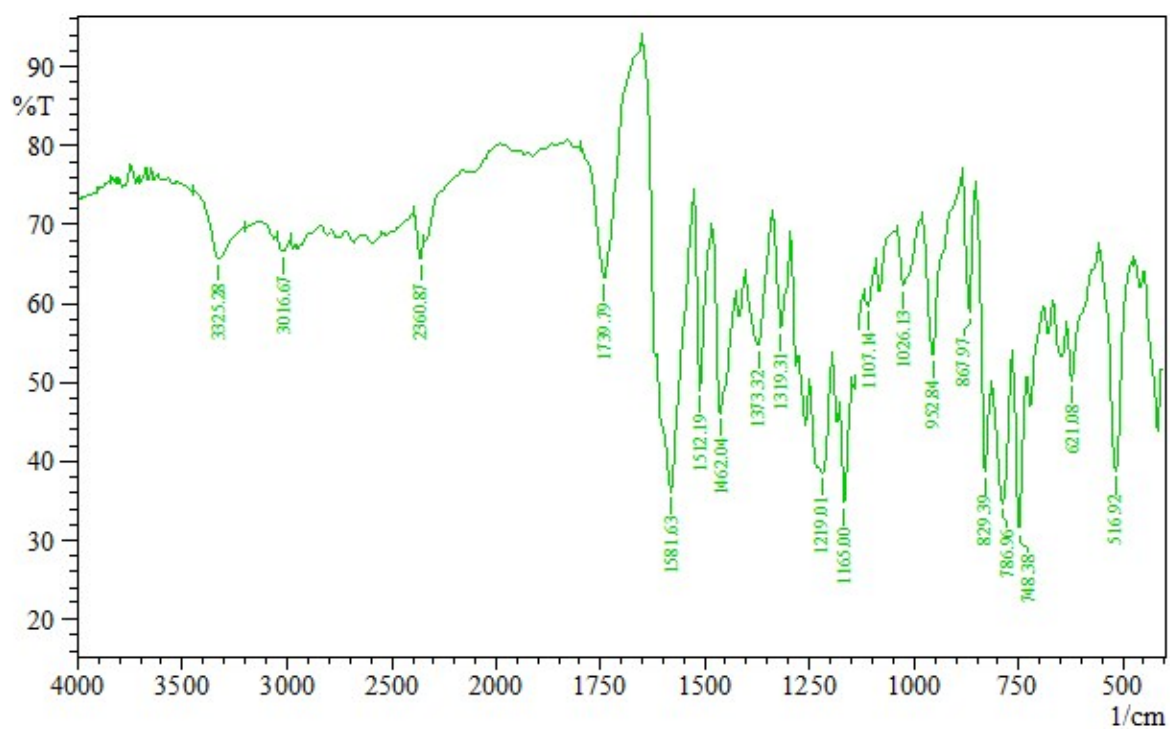

Fig. S39 FTIR spectrum of [A4-Zn(OAc)<sub>2</sub>] adduct

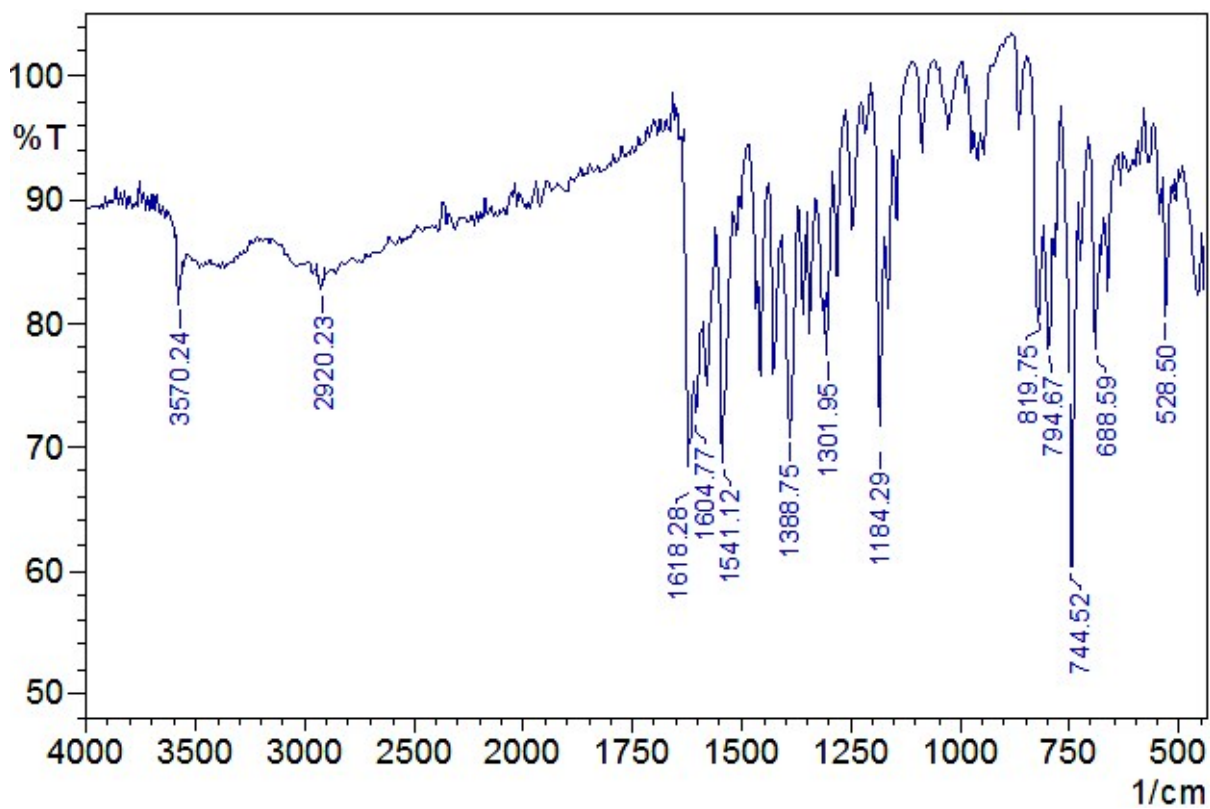

Fig. S40 FTIR spectrum of [A5-Zn(OAc)<sub>2</sub>] adduct

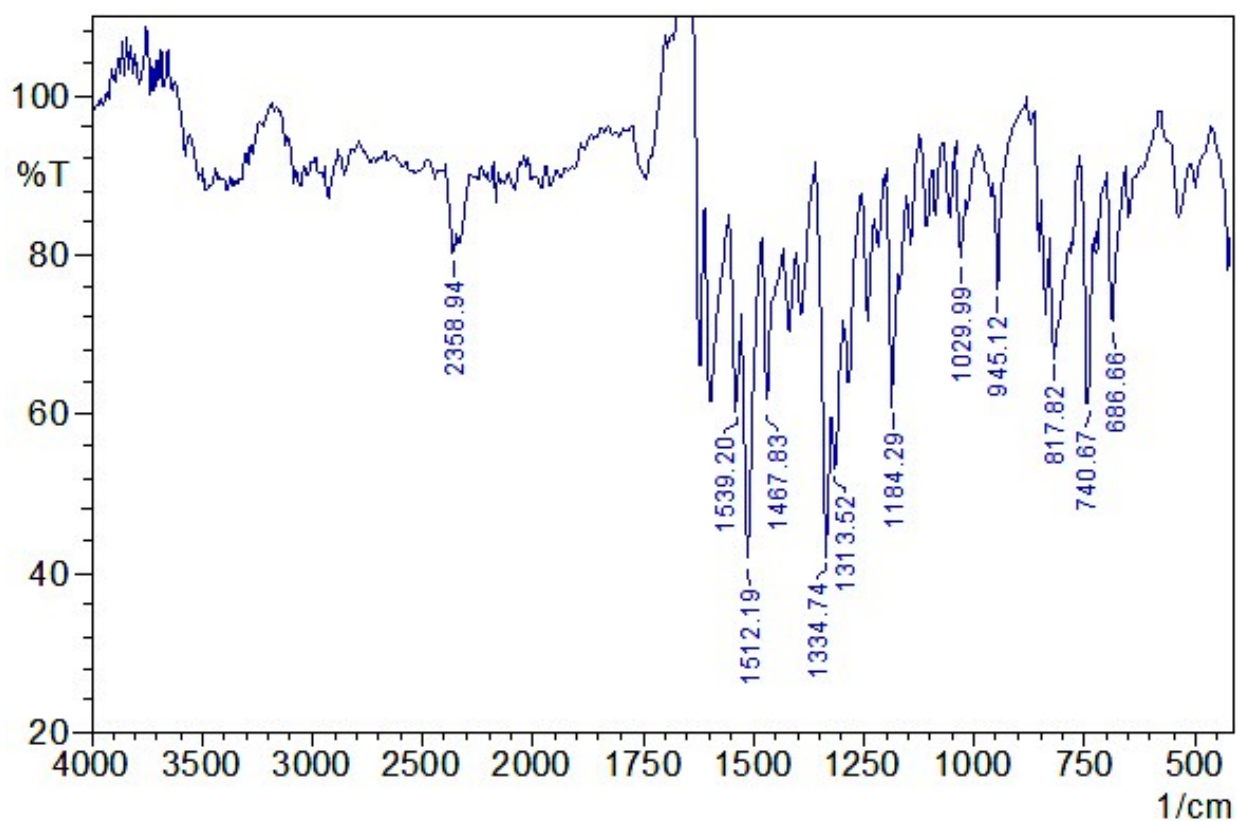

Fig. S41 FTIR spectrum of [A6-Zn(OAc)<sub>2</sub>] adduct

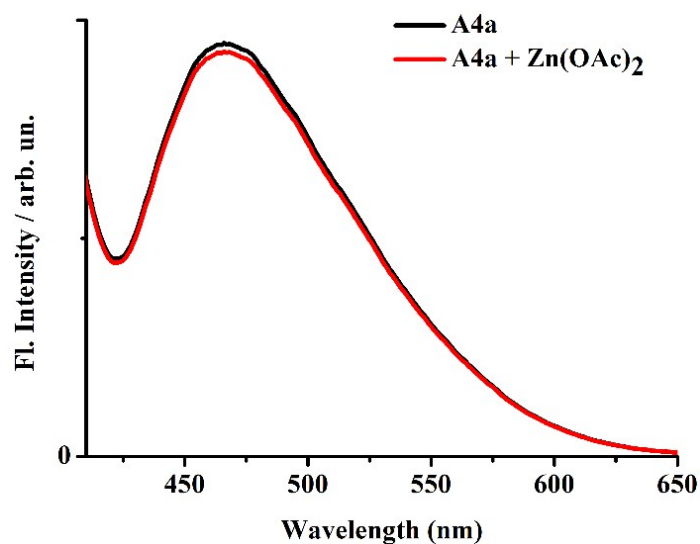

Fig. S42 Effect of Zn(OAc)<sub>2</sub> (100 μM) on the emission spectra of A4a (10 μM, λ<sub>ex</sub>, 355 nm; λ<sub>em</sub>, 465 nm) in water-DMSO (1: 9, v/v).

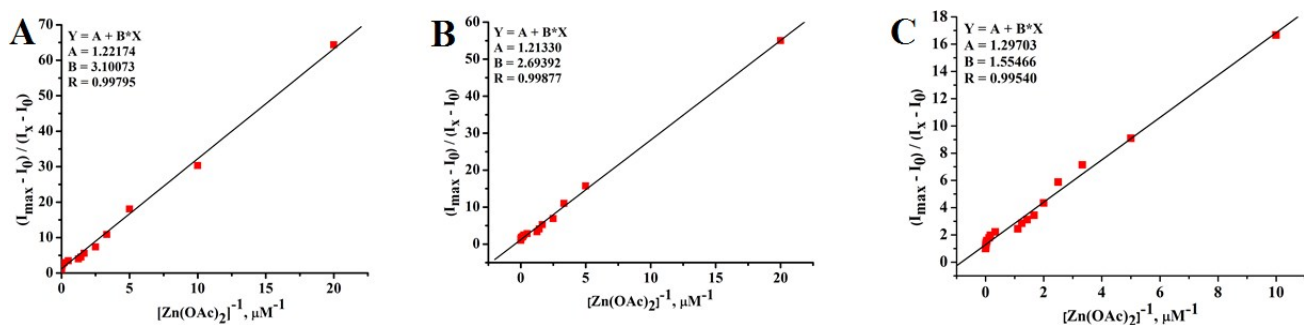

**Fig. S43** Determination of binding constant of [A] A4 ( $\lambda_{\text{ex}}$ , 370 nm;  $\lambda_{\text{em}}$ , 487 nm, from Fig. 3), [B] A5 ( $\lambda_{\text{ex}}$ , 430 nm;  $\lambda_{\text{em}}$ , 495 nm, from Fig. S21A) and [C] A6 ( $\lambda_{\text{ex}}$ , 337 nm;  $\lambda_{\text{em}}$ , 520 nm, from Fig. S21B) for  $\text{Zn}(\text{OAc})_2$  in DMSO–water = 9 : 1, v/v, 0.1 M HEPES buffer, pH 7.4

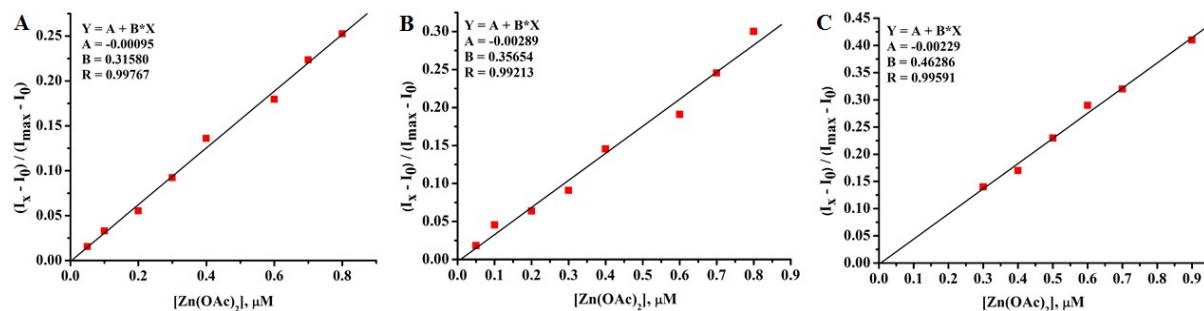

**Fig. S44** Emission intensities of [A] A4 (10  $\mu\text{M}$ ,  $\lambda_{\text{ex}}$ , 370 nm;  $\lambda_{\text{em}}$ , 487 nm, from Fig. 3); [B] A5 (10  $\mu\text{M}$ ,  $\lambda_{\text{ex}}$ , 430 nm;  $\lambda_{\text{em}}$ , 495 nm from Fig. S21A) and [C] A6 (10  $\mu\text{M}$ ,  $\lambda_{\text{ex}}$ , 337 nm;  $\lambda_{\text{em}}$ , 520 nm from Fig. S21B) as a function of added  $\text{Zn}(\text{OAc})_2$  in DMSO–water (9 : 1, v/v), 0.1 M HEPES buffer, pH 7.4



Table S1 Crystal data and structure refinement for A4 and A6

|                                    | <b>A4</b><br>(CCDC No.: 1018133)                                                            | <b>A6</b><br>(CCDC No.: 1415557)                                                                       |
|------------------------------------|---------------------------------------------------------------------------------------------|--------------------------------------------------------------------------------------------------------|
| Empirical formula                  | C <sub>18</sub> H <sub>14</sub> N <sub>2</sub> O <sub>2</sub>                               | C <sub>18</sub> H <sub>13</sub> N <sub>3</sub> O <sub>3</sub>                                          |
| Formula weight                     | 290.31 g/mol                                                                                | 319.31 g/mol                                                                                           |
| Temperature                        | 296(2) K                                                                                    | 296(2) K                                                                                               |
| Wavelength                         | 0.71073 Å                                                                                   | 0.71073 Å                                                                                              |
| Crystal system                     | Monoclinic                                                                                  | Triclinic                                                                                              |
| Space group                        | <i>P</i> 1 21/ <i>c</i> 1                                                                   | <i>P</i> -1                                                                                            |
| Unit cell dimensions               | a = 5.9644(5) Å; α = 90°<br>b = 14.7386(12) Å; β = 92.149(6)°<br>c = 16.5422(13) Å; γ = 90° | a = 7.2028(3) Å; α = 81.753(3)°<br>b = 7.9197(3) Å; β = 84.845(2)°<br>c = 14.7696(6) Å; γ = 65.428(2)° |
| Volume                             | 1453.2(2) Å <sup>3</sup>                                                                    | 757.87(5) Å <sup>3</sup>                                                                               |
| Z                                  | 4                                                                                           | 2                                                                                                      |
| Density (calculated)               | 1.327 g/cm <sup>3</sup>                                                                     | 1.399 g/cm <sup>3</sup>                                                                                |
| Absorption coefficient             | 0.088 mm <sup>-1</sup>                                                                      | 0.098 mm <sup>-1</sup>                                                                                 |
| F(000)                             | 608                                                                                         | 332                                                                                                    |
| Crystal size                       | 0.16 x 0.10 x 0.04 mm <sup>3</sup>                                                          | 0.18 x 0.14 x 0.04 mm <sup>3</sup>                                                                     |
| Theta range for data collection    | 1.85 to 28.42°                                                                              | 3.11 to 26.29°                                                                                         |
| Index ranges                       | -7 ≤ h ≤ 7, -17 ≤ k ≤ 19, -21 ≤ l ≤ 22                                                      | -8 ≤ h ≤ 8, -9 ≤ k ≤ 9, -18 ≤ l ≤ 18                                                                   |
| Reflections collected              | 26550                                                                                       | 11866                                                                                                  |
| Independent reflections            | 3611 [R(int) = 0.0562]                                                                      | 3048 [R(int) = 0.0331]                                                                                 |
| Completeness to theta = 22.21°     | 99.0%                                                                                       | 99.4%                                                                                                  |
| Absorption correction              | multi-scan                                                                                  | multi-scan                                                                                             |
| Ratio of min. to max. transmission | 0.894                                                                                       | 0.923                                                                                                  |
| Refinement method                  | Full-matrix least-squares on F <sup>2</sup>                                                 | Full-matrix least-squares on F <sup>2</sup>                                                            |
| Refinement program                 | SHELXL-2014 (Sheldrick, 2014)                                                               | SHELXL-2014/6 (Sheldrick, 2014)                                                                        |
| Data / restraints / parameters     | 3611 / 0 / 201                                                                              | 3048 / 0 / 219                                                                                         |
| Goodness-of-fit on F <sup>2</sup>  | 1.036                                                                                       | 1.042                                                                                                  |
| Final R indices [I > 2σ(I)]        | R1 = 0.0527, wR2 = 0.1493                                                                   | R1 = 0.0477, wR2 = 0.1300                                                                              |
| R indices (all data)               | R1 = 0.1137, wR2 = 0.1925                                                                   | R1 = 0.0806, wR2 = 0.1547                                                                              |
| Largest diff. peak and hole        | 0.239 and -0.156 eÅ <sup>-3</sup>                                                           | 0.171 and -0.172 eÅ <sup>-3</sup>                                                                      |
| R.M.S. deviation from mean         | 0.038 eÅ <sup>-3</sup>                                                                      | 0.057 eÅ <sup>-3</sup>                                                                                 |



Table S2 Selected bond lengths (Å) for A4

|           |          |           |          |
|-----------|----------|-----------|----------|
| O001-C008 | 1.358(2) | N002-C00A | 1.283(2) |
| N002-N003 | 1.387(2) | N003-C007 | 1.301(2) |
| O004-C00E | 1.312(2) | C005-C00C | 1.389(2) |
| C005-C00D | 1.398(2) | C005-C00A | 1.443(2) |
| C006-C00E | 1.415(3) | C006-C007 | 1.421(2) |
| C006-C009 | 1.446(2) | C008-C00H | 1.385(2) |
| C008-C00B | 1.389(3) | C009-C00G | 1.412(3) |
| C009-C00F | 1.418(3) | C00B-C00C | 1.376(3) |
| C00D-C00H | 1.364(3) | C00E-C00L | 1.417(3) |
| C00F-C00I | 1.368(3) | C00G-C00J | 1.410(3) |
| C00G-C00K | 1.420(3) | C00I-C00M | 1.385(3) |
| C00J-C00M | 1.354(3) | C00K-C00L | 1.348(3) |

Table S3 Selected bond angles (°) for A4

|                |            |                |            |
|----------------|------------|----------------|------------|
| C00A-N002-N003 | 113.80(15) | C007-N003-N002 | 117.16(15) |
| C00C-C005-C00D | 117.37(17) | C00C-C005-C00A | 120.81(16) |
| C00D-C005-C00A | 121.81(16) | C00E-C006-C007 | 119.24(18) |
| C00E-C006-C009 | 119.48(18) | C007-C006-C009 | 121.27(17) |
| N003-C007-C006 | 122.47(17) | O001-C008-C00H | 118.31(17) |
| O001-C008-C00B | 122.52(17) | C00H-C008-C00B | 119.17(18) |
| C00G-C009-C00F | 117.11(19) | C00G-C009-C006 | 119.66(18) |
| C00F-C009-C006 | 123.15(17) | N002-C00A-C005 | 122.41(16) |
| C00C-C00B-C008 | 119.79(17) | C00B-C00C-C005 | 121.67(17) |
| C00H-C00D-C005 | 121.39(17) | O004-C00E-C006 | 122.02(18) |
| O004-C00E-C00L | 118.9(2)   | C006-C00E-C00L | 119.1(2)   |
| C00I-C00F-C009 | 121.5(2)   | C00J-C00G-C009 | 119.4(2)   |
| C00J-C00G-C00K | 122.4(2)   | C009-C00G-C00K | 118.2(2)   |
| C00D-C00H-C008 | 120.54(17) | C00F-C00I-C00M | 120.8(2)   |
| C00M-C00J-C00G | 121.9(2)   | C00L-C00K-C00G | 122.6(2)   |
| C00K-C00L-C00E | 120.9(2)   | C00J-C00M-C00I | 119.3(2)   |

Table S4 Selected bond lengths (Å) for A6

|           |            |           |            |
|-----------|------------|-----------|------------|
| O1-C00D   | 1.3484(19) | O1-H1     | 0.82       |
| N002-C009 | 1.2860(18) | N002-N003 | 1.4037(18) |
| N003-C007 | 1.2744(19) | O3-N1     | 1.227(2)   |
| N1-O2     | 1.215(2)   | N1-C00A   | 1.472(2)   |
| C007-C00B | 1.463(2)   | C007-H007 | 0.93       |
| C008-C00D | 1.396(2)   | C008-C00C | 1.441(2)   |
| C008-C009 | 1.443(2)   | C009-H009 | 0.93       |
| C00A-C00E | 1.373(2)   | C00A-C00F | 1.376(2)   |
| C00B-C00H | 1.385(2)   | C00B-C00G | 1.392(2)   |
| C00C-C00L | 1.412(2)   | C00C-C00I | 1.422(2)   |
| C00D-C00K | 1.413(2)   | C00E-C00G | 1.376(2)   |
| C00E-H00E | 0.93       | C00F-C00H | 1.386(2)   |
| C00F-H00F | 0.93       | C00G-H00G | 0.93       |
| C00H-H00H | 0.93       | C00I-C00J | 1.413(3)   |
| C00I-C00M | 1.413(2)   | C00J-C00K | 1.357(2)   |
| C00J-H00J | 0.93       | C00K-H00K | 0.93       |
| C00L-C00N | 1.357(2)   | C00L-H00L | 0.93       |
| C00M-C00O | 1.346(3)   | C00M-H00M | 0.93       |
| C00N-C00O | 1.398(3)   | C00N-H00N | 0.93       |
| C00O-H00O | 0.93       |           |            |

Table S5 Selected bond angles (°) for A6

|                |            |                |            |
|----------------|------------|----------------|------------|
| C00D-O1-H1     | 109.5      | C009-N002-N003 | 113.34(13) |
| C007-N003-N002 | 112.90(14) | O2-N1-O3       | 123.40(16) |
| O2-N1-C00A     | 118.52(17) | O3-N1-C00A     | 118.07(17) |
| N003-C007-C00B | 121.52(15) | N003-C007-H007 | 119.2      |
| C00B-C007-H007 | 119.2      | C00D-C008-C00C | 118.96(14) |
| C00D-C008-C009 | 119.80(14) | C00C-C008-C009 | 121.22(15) |
| N002-C009-C008 | 121.90(15) | N002-C009-H009 | 119.0      |
| C008-C009-H009 | 119.0      | C00E-C00A-C00F | 122.46(14) |
| C00E-C00A-N1   | 119.09(16) | C00F-C00A-N1   | 118.45(15) |
| C00H-C00B-C00G | 119.21(14) | C00H-C00B-C007 | 119.87(15) |
| C00G-C00B-C007 | 120.91(14) | C00L-C00C-C00I | 116.99(15) |
| C00L-C00C-C008 | 123.71(14) | C00I-C00C-C008 | 119.31(16) |
| O1-C00D-C008   | 122.78(14) | O1-C00D-C00K   | 116.35(16) |
| C008-C00D-C00K | 120.87(16) | C00A-C00E-C00G | 118.71(15) |
| C00A-C00E-H00E | 120.6      | C00G-C00E-H00E | 120.6      |
| C00A-C00F-C00H | 118.24(15) | C00A-C00F-H00F | 120.9      |
| C00H-C00F-H00F | 120.9      | C00E-C00G-C00B | 120.63(15) |
| C00E-C00G-H00G | 119.7      | C00B-C00G-H00G | 119.7      |
| C00B-C00H-C00F | 120.75(16) | C00B-C00H-H00H | 119.6      |
| C00F-C00H-H00H | 119.6      | C00J-C00I-C00M | 121.86(16) |
| C00J-C00I-C00C | 118.72(16) | C00M-C00I-C00C | 119.42(18) |
| C00K-C00J-C00I | 122.13(16) | C00K-C00J-H00J | 118.9      |
| C00I-C00J-H00J | 118.9      | C00J-C00K-C00D | 119.92(18) |
| C00J-C00K-H00K | 120.0      | C00D-C00K-H00K | 120.0      |
| C00N-C00L-C00C | 121.64(17) | C00N-C00L-H00L | 119.2      |
| C00C-C00L-H00L | 119.2      | C00O-C00M-C00I | 121.54(18) |
| C00O-C00M-H00M | 119.2      | C00I-C00M-H00M | 119.2      |
| C00L-C00N-C00O | 121.0(2)   | C00L-C00N-H00N | 119.5      |
| C00O-C00N-H00N | 119.5      | C00M-C00O-C00N | 119.39(19) |
| C00M-C00O-H00O | 120.3      | C00N-C00O-H00O | 120.3      |

**Table S6** Data from theoretical DFT studies

| Compound | Electronic transitions | Energy <sup>a</sup> (eV) | Wavelength (nm) | fb     | Transitions involved                                                                                                                          |
|----------|------------------------|--------------------------|-----------------|--------|-----------------------------------------------------------------------------------------------------------------------------------------------|
| A4       | S0→S1                  | 3.4686                   | 357.45          | 0.3989 | HOMO→LUMO                                                                                                                                     |
|          | S0→S2                  | 3.5516                   | 349.09          | 0.0378 | HOMO-3→LUMO<br>HOMO-1→LUMO<br>HOMO→LUMO<br>HOMO→LUMO+1                                                                                        |
|          | S0→S3                  | 4.0388                   | 306.98          | 0.0531 | HOMO-3→LUMO<br>HOMO-3→LUMO+1<br>HOMO-2→LUMO<br>HOMO-1→LUMO<br>HOMO-1→LUMO+1<br>HOMO→LUMO+1                                                    |
|          | S0→S4                  | 4.1420                   | 299.34          | 0.0389 | HOMO-3→LUMO+1<br>HOMO-1→LUMO+1<br>HOMO→LUMO+1                                                                                                 |
|          | S0→S5                  | 4.1913                   | 295.81          | 0.1426 | HOMO-3→LUMO<br>HOMO-2→LUMO<br>HOMO-2→LUMO+1<br>HOMO-1→LUMO+1<br>HOMO-1→LUMO+3<br>HOMO→LUMO+1<br>HOMO→LUMO+3                                   |
|          | S0→S6                  | 4.3133                   | 287.45          | 0.3957 | HOMO-3→LUMO<br>HOMO-2→LUMO<br>HOMO-1→LUMO<br>HOMO-1→LUMO+1<br>HOMO→LUMO+1                                                                     |
|          | S0→S7                  | 4.6165                   | 268.57          | 0.0078 | HOMO-4→LUMO<br>HOMO-4→LUMO+1<br>HOMO-2→LUMO+1<br>HOMO-1→LUMO+2<br>HOMO→LUMO+2                                                                 |
|          | S0→S8                  | 4.6258                   | 268.03          | 0.0113 | HOMO-4→LUMO<br>HOMO-3→LUMO+1<br>HOMO-2→LUMO<br>HOMO-2→LUMO+1<br>HOMO-1→LUMO+2<br>HOMO-1→LUMO+3<br>HOMO-1→LUMO+4<br>HOMO→LUMO+1<br>HOMO→LUMO+3 |
|          | S0→S9                  | 4.7755                   | 259.63          | 0.0150 | HOMO-5→LUMO<br>HOMO-3→LUMO+1<br>HOMO-3→LUMO+4<br>HOMO-2→LUMO<br>HOMO-2→LUMO+1<br>HOMO-1→LUMO+1<br>HOMO-1→LUMO+4<br>HOMO→LUMO+3<br>HOMO→LUMO+4 |

|                                            |        |        |        |        |                                                                                                                        |
|--------------------------------------------|--------|--------|--------|--------|------------------------------------------------------------------------------------------------------------------------|
|                                            | S0→S10 | 4.9262 | 251.68 | 0.0235 | HOMO-5→LUMO<br>HOMO-3→LUMO+1<br>HOMO-1→LUMO+2<br>HOMO-1→LUMO+4<br>HOMO→LUMO+2<br>HOMO→LUMO+4                           |
| <b>[A4+Zn(OAc)<sub>2</sub>]<br/>adduct</b> | S0→S1  | 2.9116 | 425.83 | 0.8629 | HOMO→LUMO                                                                                                              |
|                                            | S0→S2  | 3.5555 | 348.71 | 0.2180 | HOMO-3→LUMO<br>HOMO-2→LUMO<br>HOMO-1→LUMO                                                                              |
|                                            | S0→S3  | 3.6235 | 342.17 | 0.0090 | HOMO-3→LUMO<br>HOMO-2→LUMO                                                                                             |
|                                            | S0→S4  | 3.7677 | 329.07 | 0.0387 | HOMO-3→LUMO<br>HOMO-2→LUMO<br>HOMO-1→LUMO<br>HOMO →LUMO+1                                                              |
|                                            | S0→S5  | 3.9833 | 311.26 | 0.1518 | HOMO-2→LUMO<br>HOMO-1→LUMO<br>HOMO-1 →LUMO+1<br>HOMO →LUMO+1                                                           |
|                                            | S0→S6  | 4.3870 | 282.62 | 0.0007 | HOMO-4→LUMO<br>HOMO-4→LUMO+1<br>HOMO-1→LUMO+3<br>HOMO→LUMO+2<br>HOMO→LUMO+3                                            |
|                                            | S0→S7  | 4.4842 | 276.49 | 0.0179 | HOMO-8→LUMO<br>HOMO-7→LUMO<br>HOMO-6→LUMO<br>HOMO-5→LUMO<br>HOMO-4→LUMO<br>HOMO-3→LUMO+1<br>HOMO→LUMO+2<br>HOMO→LUMO+3 |
|                                            | S0→S8  | 4.5274 | 273.85 | 0.0271 | HOMO-8→LUMO<br>HOMO-7→LUMO<br>HOMO-6→LUMO<br>HOMO-3→LUMO+1<br>HOMO-1→LUMO+1<br>HOMO→LUMO+2                             |
|                                            | S0→S9  | 4.5886 | 270.20 | 0.0128 | HOMO-6→LUMO<br>HOMO-5→LUMO<br>HOMO-2→LUMO+1<br>HOMO-1→LUMO+1<br>HOMO→LUMO+2<br>HOMO→LUMO+5                             |
|                                            | S0→S10 | 4.6205 | 268.33 | 0.0527 | HOMO-5→LUMO<br>HOMO-2→LUMO+1<br>HOMO-1→LUMO+1<br>HOMO→LUMO+5                                                           |

**Table. S7** Data from theoretical DFT studies

| Compound                                   | Electronic transitions | Energy <sup>a</sup> (eV) | Wavelength (nm) | f <sup>b</sup> | Transitions involved                                                        |
|--------------------------------------------|------------------------|--------------------------|-----------------|----------------|-----------------------------------------------------------------------------|
| <b>A5</b>                                  | S0→S1                  | 3.2113                   | 386.09          | 0.8786         | HOMO→LUMO                                                                   |
|                                            | S0→S2                  | 3.3056                   | 375.08          | 0.0086         | HOMO-1→LUMO                                                                 |
|                                            | S0→S3                  | 3.9115                   | 316.98          | 0.1485         | HOMO-3→LUMO<br>HOMO-2→LUMO<br>HOMO→LUMO+2                                   |
|                                            | S0→S4                  | 4.0179                   | 308.58          | 0.0660         | HOMO-3→LUMO<br>HOMO→LUMO+1                                                  |
|                                            | S0→S5                  | 4.2031                   | 294.98          | 0.2517         | HOMO-3→LUMO<br>HOMO-2→LUMO<br>HOMO→LUMO+1                                   |
|                                            | S0→S6                  | 4.3961                   | 282.03          | 0.0195         | HOMO-4→LUMO<br>HOMO-4→LUMO+1<br>HOMO→LUMO+3                                 |
|                                            | S0→S7                  | 4.4105                   | 281.11          | 0.0051         | HOMO-1→LUMO+1<br>HOMO-1→LUMO+4                                              |
|                                            | S0→S8                  | 4.6512                   | 266.57          | 0.0509         | HOMO-3→LUMO+1<br>HOMO-2→LUMO<br>HOMO-2→LUMO+1<br>HOMO→LUMO+1<br>HOMO→LUMO+2 |
|                                            | S0→S9                  | 4.8546                   | 255.40          | 0.0184         | HOMO-5→LUMO<br>HOMO-3→LUMO+1<br>HOMO→LUMO+3<br>HOMO→LUMO+4                  |
|                                            | S0→S10                 | 5.0162                   | 247.17          | 0.0406         | HOMO-5→LUMO<br>HOMO-4→LUMO<br>HOMO-4→LUMO+1<br>HOMO→LUMO+3<br>HOMO→LUMO+4   |
| <b>[A5+Zn(OAc)<sub>2</sub>]<br/>adduct</b> | S0→S1                  | 2.9182                   | 424.87          | 0.7528         | HOMO→LUMO                                                                   |
|                                            | S0→S2                  | 3.5439                   | 349.85          | 0.1942         | HOMO-1→LUMO<br>HOMO→LUMO+5                                                  |
|                                            | S0→S3                  | 3.6413                   | 340.50          | 0.0095         | HOMO-3→LUMO                                                                 |
|                                            | S0→S4                  | 3.8660                   | 320.70          | 0.0165         | HOMO-2→LUMO<br>HOMO→LUMO+1                                                  |
|                                            | S0→S5                  | 4.0251                   | 308.03          | 0.3094         | HOMO-2→LUMO<br>HOMO→LUMO+1                                                  |
|                                            | S0→S6                  | 4.2389                   | 292.49          | 0.0180         | HOMO-4→LUMO<br>HOMO-4→LUMO+1<br>HOMO-2→LUMO+3<br>HOMO→LUMO+3                |
|                                            | S0→S7                  | 4.3968                   | 281.99          | 0.0247         | HOMO-8→LUMO                                                                 |

|  |        |        |        |        |                                                                                                                                             |
|--|--------|--------|--------|--------|---------------------------------------------------------------------------------------------------------------------------------------------|
|  | S0→S8  | 4.4338 | 279.63 | 0.0173 | HOMO-7→LUMO<br>HOMO-6→LUMO<br>HOMO-3→LUMO+1<br>HOMO→LUMO+2<br><br>HOMO-8→LUMO<br>HOMO-7→LUMO<br>HOMO-6→LUMO<br>HOMO-3→LUMO+1<br>HOMO→LUMO+2 |
|  | S0→S9  | 4.5599 | 271.90 | 0.0291 | HOMO-1→LUMO+1<br>HOMO→LUMO+5                                                                                                                |
|  | S0→S10 | 4.6301 | 267.78 | 0.0002 | HOMO-5→LUMO                                                                                                                                 |

**Table. S8** Data from theoretical DFT studies

| Compound                              | Electronic transitions | Energy <sup>a</sup> (eV) | Wavelength (nm) | f <sup>b</sup> | Transitions involved                                                    |
|---------------------------------------|------------------------|--------------------------|-----------------|----------------|-------------------------------------------------------------------------|
| <b>A6</b>                             | S0→S1                  | 2.4445                   | 507.19          | 0.0293         | HOMO→LUMO                                                               |
|                                       | S0→S2                  | 3.0745                   | 403.27          | 0.4085         | HOMO-3→LUMO<br>HOMO-2→LUMO<br>HOMO-1→LUMO                               |
|                                       | S0→S3                  | 3.1656                   | 391.66          | 0.0028         | HOMO-2→LUMO<br>HOMO-1→LUMO                                              |
|                                       | S0→S4                  | 3.4785                   | 356.43          | 0.2365         | HOMO-6→LUMO<br>HOMO-3→LUMO<br>HOMO-2→LUMO<br>HOMO-1→LUMO<br>HOMO→LUMO+1 |
|                                       | S0→S5                  | 3.4819                   | 356.08          | 0.0321         | HOMO-6→LUMO<br>HOMO-6→LUMO+1<br>HOMO-6→LUMO+2<br>HOMO-3→LUMO            |
|                                       | S0→S6                  | 3.6891                   | 336.08          | 0.1204         | HOMO-3→LUMO<br>HOMO-1→LUMO<br>HOMO→LUMO+1                               |
|                                       | S0→S7                  | 3.8360                   | 323.21          | 0.0254         | HOMO-4→LUMO                                                             |
|                                       | S0→S8                  | 4.0028                   | 309.74          | 0.0125         | HOMO-10→LUMO<br>HOMO-2→LUMO+1<br>HOMO-1→LUMO+1<br>HOMO-1→LUMO+5         |
|                                       | S0→S9                  | 4.0407                   | 306.84          | 0.0008         | HOMO-10→LUMO<br>HOMO-10→LUMO+1<br>HOMO-10→LUMO+2<br>HOMO-1→LUMO+1       |
|                                       | S0→S10                 | 4.1599                   | 298.05          | 0.0275         | HOMO-1→LUMO+2<br>HOMO→LUMO+2                                            |
| <b>[A6+Zn(OAc)<sub>2</sub> adduct</b> | S0→S1                  | 2.0833                   | 595.13          | 0.4522         | HOMO→LUMO                                                               |

|        |        |        |        |                                                                                |
|--------|--------|--------|--------|--------------------------------------------------------------------------------|
| S0→S2  | 2.7430 | 452.01 | 0.0871 | HOMO-1→LUMO                                                                    |
| S0→S3  | 3.0788 | 402.70 | 0.3080 | HOMO-2→LUMO<br>HOMO→LUMO+1                                                     |
| S0→S4  | 3.1126 | 398.33 | 0.1235 | HOMO-3→LUMO<br>HOMO-2→LUMO<br>HOMO-2→LUMO+1<br>HOMO→LUMO+1                     |
| S0→S5  | 3.2620 | 380.08 | 0.0000 | HOMO-9→LUMO<br>HOMO-9→LUMO+1                                                   |
| S0→S6  | 3.4058 | 364.03 | 0.2530 | HOMO-3→LUMO<br>HOMO-2→LUMO<br>HOMO→LUMO+1                                      |
| S0→S7  | 3.5835 | 345.98 | 0.0308 | HOMO-5→LUMO                                                                    |
| S0→S8  | 3.6584 | 338.90 | 0.1301 | HOMO-1→LUMO+1                                                                  |
| S0→S9  | 3.7569 | 330.02 | 0.0052 | HOMO-12→LUMO<br>HOMO-4→LUMO                                                    |
| S0→S10 | 3.7695 | 328.91 | 0.0006 | HOMO-13→LUMO<br>HOMO-12→LUMO<br>HOMO-12→LUMO+1<br>HOMO-4→LUMO<br>HOMO-2→LUMO+1 |
